# Supplementary material for: Microbial composition in seasonal time series of free tropospheric air and precipitation reveals community separation
Source: Springer Nature journal article supplement (doi:10.1007/s10453-019-09606-x), 2019-09-04
Supplement: 10453_2019_9606_MOESM1_ESM.pdf [file 10453_2019_9606_MOESM1_ESM.pdf]

## Supplementary Data

Table S1 Top10 most relative abundant unique bacterial genera hits on genus level air, differentiated by season, in air samples

|                              | Phylum                    | Class               | Order                  | Family                   | Genus                      |
|------------------------------|---------------------------|---------------------|------------------------|--------------------------|----------------------------|
| <b>May</b>                   | Proteobacteria            | Betaproteobacteria  | Burkholderiales        | Alcaligenaceae           | Advenella                  |
|                              | Bacteroidetes             | Cytophagia          | Cytophagales           | Cytophagaceae            | Arcicella                  |
|                              | Firmicutes                | Clostridia          | Clostridiales          | Peptostreptococcaceae    | Proteocatella              |
|                              | Proteobacteria            | Gammaproteobacteria | Enterobacteriales      | Enterobacteriaceae       | Buchnera                   |
|                              | Actinobacteria            | Actinobacteria      | Actinomycetales        | Pseudonocardiaceae       | Saccharopolyspora          |
|                              | Actinobacteria            | Actinobacteria      | Actinomycetales        | Thermomonosporaceae      | Actinoallomurus            |
|                              | Proteobacteria            | Gammaproteobacteria | Xanthomonadales        | Xanthomonadaceae         | Lysobacter                 |
|                              | Proteobacteria            | Deltaproteobacteria | Syntrophobacterales    | Syntrophobacteraceae     | Desulfovirga               |
|                              | Bacteroidetes             | Sphingobacteriia    | Sphingobacteriales     | Chitinophagaceae         | Vibrionimonas              |
|                              | Proteobacteria            | Alphaproteobacteria | Rhizobiales            | Rhizobiaceae             | Shinella                   |
| <b>Aug</b>                   | Proteobacteria            | Alphaproteobacteria | Rhodobacterales        | Rhodobacteraceae         | Celeribacter               |
|                              | Proteobacteria            | Gammaproteobacteria | Pseudomonadales        | Moraxellaceae            | Paraperlucidibaca          |
|                              | Proteobacteria            | Betaproteobacteria  | Sulfuricellales        | Sulfuricellaceae         | Sulfuricella               |
|                              | Proteobacteria            | Gammaproteobacteria | Enterobacteriales      | Enterobacteriaceae       | Proteus                    |
|                              | Bacteroidetes             | Sphingobacteriia    | Sphingobacteriales     | Chitinophagaceae         | Terrimonas                 |
|                              | Proteobacteria            | Gammaproteobacteria | Xanthomonadales        | Sinobacteraceae          | Povalibacter               |
|                              | Firmicutes                | Clostridia          | Clostridiales          | Clostridiales I. S.      | Sporanaerobacter           |
|                              | Firmicutes                | Bacilli             | Bacillales             | Staphylococcaceae        | Jeotgalicoccus             |
|                              | Firmicutes                | Bacilli             | Lactobacillales        | Enterococcaceae          | Enterococcus               |
|                              | Proteobacteria            | Alphaproteobacteria | Rickettsiales          | Rickettsiaceae           | Rickettsia                 |
| <b>Nov</b>                   | Firmicutes                | Clostridia          | Clostridiales          | Clostridiales I.S.       | Tissierella                |
|                              | Proteobacteria            | Alphaproteobacteria | Rhizobiales            | Xanthobacteraceae        | Azorhizobium               |
|                              | Chlamydiae                | Chlamydia           | Chlamydiales           | Simkaniaceae             | Simkania                   |
|                              | Firmicutes                | Bacilli             | Bacillales             | Planococcaceae           | Caryophanon                |
|                              | Actinobacteria            | Actinobacteria      | Actinomycetales        | Jiangellaceae            | Jiangella                  |
|                              | Proteobacteria            | Betaproteobacteria  | Burkholderiales        | Burkholderiaceae         | Limnobacter                |
|                              | Firmicutes                | Bacilli             | Bacillales             | Planococcaceae           | Planococcus                |
|                              | Proteobacteria            | Alphaproteobacteria | Rhodospirillales       | unclass Rhodospirillales | Elioraea                   |
|                              | Chloroflexi               | Anaerolineae        | Anaerolineales         | Anaerolineaceae          | unclass_Anaerolineaceae    |
|                              | Proteobacteria            | Gammaproteobacteria | Enterobacteriales      | Enterobacteriaceae       | Citrobacter                |
| <b>Feb</b>                   | Proteobacteria            | Gammaproteobacteria | Xanthomonadales        | Xanthomonadaceae         | Metallibacterium           |
|                              | Proteobacteria            | Betaproteobacteria  | Neisseriales           | Neisseriaceae            | Snodgrassella              |
|                              | Actinobacteria            | Actinobacteria      | Actinomycetales        | Dermatophilaceae         | uncl Dermatophilaceae      |
|                              | Proteobacteria            | Gammaproteobacteria | Alteromonadales        | Alteromonadaceae         | Alteromonas                |
|                              | Verrucomicrobia           | Verrucomicrobiae    | Verrucomicrobiales     | Verrucomicrobiaceae      | Roseibacillus              |
|                              | Bacteroidetes             | Flavobacteriia      | Flavobacteriales       | Flavobacteriaceae        | Ulvibacter                 |
|                              | Proteobacteria            | Gammaproteobacteria | Chromatiales           | Chromatiaceae            | Rheinheimera               |
|                              | Firmicutes                | Clostridia          | Clostridiales          | Ruminococcaceae          | Clostridium III            |
|                              | Planctomycetes            | Planctomycetia      | Planctomycetales       | Planctomycetaceae        | Singulisphaera             |
|                              | Deinococcus-Thermus       | Deinococci          | Thermales              | Thermaceae               | Meiothermus                |
| <b>common in all</b>         | Firmicutes                | Bacilli             | Bacillales             | Bacillaceae 1            | Geobacillus                |
|                              | Proteobacteria            | Alphaproteobacteria | Rhizobiales            | Phyllobacteriaceae       | Aminobacter                |
|                              | Planctomycetes            | Planctomycetia      | Planctomycetales       | Planctomycetaceae        | Schlesneria                |
|                              | Proteobacteria            | Betaproteobacteria  | Burkholderiales        | Burkholderiaceae         | Burkholderia               |
|                              | Cyanobacteria/Chloroplast | Chloroplast         | uncl Chloroplast       | Chloroplast              | Chlorophyta                |
|                              | Actinobacteria            | Actinobacteria      | Actinomycetales        | Microbacteriaceae        | Microbacterium             |
|                              | Proteobacteria            | Alphaproteobacteria | Rhizobiales            | Bradyrhizobiaceae        | Rhodopseudomonas           |
|                              | Acidobacteria             | Acidobacteria_Gp1   | uncl Acidobacteria_Gp1 | uncl Acidobacteria_Gp1   | Gp1                        |
|                              | Proteobacteria            | Gammaproteobacteria | Enterobacteriales      | Enterobacteriaceae       | uncl Enterobacteriaceae    |
|                              | Planctomycetes            | Planctomycetia      | Planctomycetales       | Planctomycetaceae        | uncl Planctomycetaceae     |
| <b>common in Aug and May</b> | Acidobacteria             | Acidobacteria Gp2   | uncl Acidobacteria_Gp2 | uncl Acidobacteria Gp2   | Gp2                        |
|                              | Firmicutes                | Bacilli             | Bacillales             | Bacillaceae 1            | Domibacillus               |
|                              | Bacteroidetes             | Bacteroidia         | Bacteroidales          | Porphyromonadaceae       | Paludibacter               |
|                              | Proteobacteria            | Gammaproteobacteria | Oceanospirillales      | Oceanospirillaceae       | unclass_Oceanospirillaceae |
|                              | Proteobacteria            | Betaproteobacteria  | Burkholderiales        | Burkholderiales i. s.    | Paucibacter                |
|                              | Bacteroidetes             | Cytophagia          | Cytophagales           | Cytophagaceae            | Dyadobacter                |
|                              | Proteobacteria            | Gammaproteobacteria | Pseudomonadales        | Moraxellaceae            | Moraxella                  |
|                              | Firmicutes                | Bacilli             | Lactobacillales        | Aerococcaceae            | Facklamia                  |
|                              | Actinobacteria            | Actinobacteria      | Actinomycetales        | Dermabacteraceae         | Dermabacter                |
|                              | Bacteroidetes             | Sphingobacteriia    | Sphingobacteriales     | Sphingobacteriaceae      | Arcticibacter              |
| <b>common in Nov and Feb</b> | Actinobacteria            | Actinobacteria      | Bifidobacteriales      | Bifidobacteriaceae       | Bifidobacterium            |
|                              | Proteobacteria            | Gammaproteobacteria | Xanthomonadales        | Xanthomonadaceae         | Vulcaniibacterium          |
|                              | Bacteroidetes             | Flavobacteriia      | Flavobacteriales       | Flavobacteriaceae        | Polaribacter               |
|                              | Actinobacteria            | Actinobacteria      | Rubrobacteriales       | Rubrobacteraceae         | Rubrobacter                |
|                              | Actinobacteria            | Actinobacteria      | Bifidobacteriales      | Bifidobacteriaceae       | Gardnerella                |
|                              | Actinobacteria            | Actinobacteria      | Coriobacteriales       | Coriobacteriaceae        | Collinsella                |
|                              | Proteobacteria            | Betaproteobacteria  | Rhodocyclales          | Rhodocyclaceae           | Sulfurisoma                |
|                              | Proteobacteria            | Gammaproteobacteria | Legionellales          | Coxiellaceae             | Aquicella                  |
|                              | Chlamydiae                | Chlamydia           | Chlamydiales           | Parachlamydiaceae        | Neochlamydia               |
|                              | Planctomycetes            | uncl Planctomycetes | uncl Planctomycetes    | uncl Planctomycetes      | uncl Planctomycetes        |

Table S2 Top 10 most relative abundant unique fungal genera hits on genus level, differentiated by season, in air samples

|                      | Phylum        | Class                | Order                    | Family                 | Genus             |
|----------------------|---------------|----------------------|--------------------------|------------------------|-------------------|
| <b>May</b>           | Ascomycota    | Eurotiomycetes       | Eurotiales               | Aspergillaceae         | unidentified      |
|                      | Basidiomycota | Tremellomycetes      | Holtermanniales          | Holtermanniales I.s.   | Holtermanniella   |
|                      | Ascomycota    | Saccharomycetes      | Saccharomycetales        | Saccharomycetales I.s. | Candida           |
|                      | Basidiomycota | Pucciniomycetes      | Pucciniales              | Pucciniastraceae       | Pucciniastrum     |
| <b>Aug</b>           | Ascomycota    | Lecanoromycetes      | Teloschistales           | Teloschistaceae        | unidentified      |
|                      | Basidiomycota | Agaricomycetes       | Agaricales               | Omphalotaceae          | Gymnopus          |
|                      | Basidiomycota | Agaricomycetes       | Agaricales               | Tricholomataceae       | Resupinatus       |
|                      | Basidiomycota | Agaricomycetes       | Agaricales               | Tricholomataceae       | Arrhenia          |
|                      | Basidiomycota | Agaricomycetes       | Polyporales              | Fomitopsidaceae        | Osteina           |
|                      | Basidiomycota | Agaricomycetes       | Thelephorales            | Thelephoraceae         | unidentified      |
|                      | Basidiomycota | Agaricomycetes       | Russulales               | Stereaceae             | Acanthophysellum  |
|                      | Basidiomycota | Agaricomycetes       | Polyporales              | Polyporaceae           | Rhodonia          |
|                      | Ascomycota    | Leotiomycetes        | Helotiales               | Hyaloscyphaceae        | Lachnum           |
|                      | Ascomycota    | Leotiomycetes        | Helotiales               | Vibrisseaceae          | unidentified      |
| <b>Nov</b>           | Ascomycota    | Dothideomycetes      | Pleosporales             | Pleosporaceae          | Curvularia        |
|                      | Basidiomycota | Agaricomycetes       | Corticiales              | Corticaceae            | Corticium         |
|                      | Ascomycota    | Leotiomycetes        | Helotiales               | Helotiaceae            | Heterosphaeria    |
|                      | Ascomycota    | Leotiomycetes        | Helotiales               | Dermateaceae           | Cryptosporiopsis  |
|                      | Basidiomycota | Tremellomycetes      | Tremellales              | Cryptococcaceae        | Kwoniella         |
|                      | Basidiomycota | Tremellomycetes      | Cystofilobasidiales      | Cystofilobasidiaceae   | Cystofilobasidium |
|                      | Basidiomycota | Agaricomycetes       | Cantharellales           | Ceratobasidiaceae      | unidentified      |
|                      | Ascomycota    | Dothideomycetes      | Dothideales              | Dothideaceae           | Endoconidioma     |
|                      | Basidiomycota | Cystobasidiomycetes  | Cystobasidiomycetes I.s. | Buckleyzymaceae        | Buckleyzyma       |
|                      | Basidiomycota | Tremellomycetes      | Tremellales              | unidentified           | unidentified      |
| <b>Feb</b>           | Basidiomycota | Agaricomycetes       | Auriculariales           | Exidiaceae             | Exidia            |
|                      | Ascomycota    | Eurotiomycetes       | Eurotiales               | Trichocomaceae         | Talaromyces       |
|                      | Ascomycota    | Taphrinomycetes      | Taphrinales              | Taphrinaceae           | Taphrina          |
|                      | Ascomycota    | Eurotiomycetes       | Chaetothyriales          | Herpotrichiellaceae    | Sorocybe          |
|                      | Ascomycota    | Eurotiomycetes       | Chaetothyriales          | Trichomeriaceae        | unidentified      |
|                      | Ascomycota    | Dothideomycetes      | Venturiales              | Symptoventuriaceae     | Scolecobasidium   |
|                      | Ascomycota    | Leotiomycetes        | Helotiales               | Helotiaceae            | Articulospora     |
|                      | Basidiomycota | Agaricostilbomycetes | Agaricostilbales         | Chionosphaeraceae      | Cystobasidiopsis  |
|                      | Basidiomycota | Agaricomycetes       | Agaricales               | Psathyrellaceae        | Homophron         |
|                      | Ascomycota    | Arthoniomycetes      | Lichenostigmatales       | Phaeococcomycetaceae   | Phaeococcomyces   |
| <b>common in all</b> | unidentified  | unidentified         | unidentified             | unidentified           | unidentified      |
|                      | Ascomycota    | unidentified         | unidentified             | unidentified           | unidentified      |
|                      | Basidiomycota | Agaricomycetes       | unidentified             | unidentified           | unidentified      |
|                      | Basidiomycota | Agaricomycetes       | Polyporales              | Fomitopsidaceae        | Fomitopsis        |
|                      | Ascomycota    | Eurotiomycetes       | Eurotiales               | Aspergillaceae         | Aspergillus       |
|                      | Basidiomycota | Agaricomycetes       | Hymenochaetales          | Hymenochaetales.I.s.   | Trichaptum        |
|                      | Basidiomycota | Agaricomycetes       | Russulales               | Bondarzewiaceae        | Heterobasidion    |
|                      | Ascomycota    | Dothideomycetes      | unidentified             | unidentified           | unidentified      |

Table S3 Top 10 most relative abundant bacterial genera in air and different precipitation types

|                                                    | Phylum                        | Class                 | Order                      | Family                 | Genus                      |
|----------------------------------------------------|-------------------------------|-----------------------|----------------------------|------------------------|----------------------------|
| <b>most abundant</b>                               | Firmicutes                    | Bacilli               | Bacillales                 | Bacillaceae 1          | Geobacillus                |
| <b>common in all</b>                               | Proteobacteria                | Alphaproteobacteria   | Rhizobiales                | Phyllobacteriaceae     | Aminobacter                |
| <b>genera</b>                                      | Cyanobacteria/<br>Chloroplast | Chloroplast           | unclass_Chloroplast        | Chloroplast            | Chlorophyta                |
|                                                    | Proteobacteria                | Alphaproteobacteria   | Rhizobiales                | Bradyrhizobiaceae      | Bosea                      |
|                                                    | Proteobacteria                | Betaproteobacteria    | Burkholderiales            | Oxalobacteraceae       | Janthinobacterium          |
|                                                    | Actinobacteria                | Actinobacteria        | Actinomycetales            | Nakamurellaceae        | Nakamurella                |
|                                                    | Proteobacteria                | Alphaproteobacteria   | Rhodospirillales           | Acetobacteraceae       | Roseomonas                 |
|                                                    | Acidobacteria                 | Acidobacteria_Gp1     | unclass_Acidobacteria_Gp1  | uncl Acidobacteria Gp1 | Gp1                        |
|                                                    | Bacteroidetes                 | Sphingobacteriia      | Sphingobacteriales         | Chitinophagaceae       | Ferruginibacter            |
|                                                    | Planctomycetes                | Planctomycetia        | Planctomycetales           | Planctomycetaceae      | uncl Planctomycetaceae     |
| <b>most abundant unique in air</b>                 | Proteobacteria                | Gammaproteobacteria   | Enterobacteriales          | Enterobacteriaceae     | Providencia                |
|                                                    | Proteobacteria                | Gammaproteobacteria   | Oceanospirillales          | Oceanospirillaceae     | Neptuniibacter             |
|                                                    | Proteobacteria                | Gammaproteobacteria   | Xanthomonadales            | Xanthomonadaceae       | Metallobacterium           |
|                                                    | Bacteroidetes                 | Flavobacteriia        | Flavobacteriales           | Flavobacteriaceae      | Polaribacter               |
|                                                    | Firmicutes                    | Clostridia            | Clostridiales              | Peptostreptococcaceae  | Proteocatella              |
|                                                    | Proteobacteria                | Alphaproteobacteria   | Rhodobacterales            | Rhodobacteraceae       | Celeribacter               |
|                                                    | Proteobacteria                | Betaproteobacteria    | Neisseriales               | Neisseriaceae          | Snodgrassella              |
|                                                    | Actinobacteria                | Actinobacteria        | Bifidobacteriales          | Bifidobacteriaceae     | Gardnerella                |
|                                                    | Proteobacteria                | Betaproteobacteria    | Hydrogenophilaes           | Hydrogenophilaceae     | Tepidiphilus               |
|                                                    | Proteobacteria                | Alphaproteobacteria   | Rhizobiales                | Xanthobacteraceae      | Azorhizobium               |
| <b>most abundant unique in snow</b>                | Firmicutes                    | Clostridia            | Clostridiales              | Peptostreptococcaceae  | Acetoanaerobium            |
|                                                    | Proteobacteria                | Gammaproteobacteria   | Aeromonadales              | Aeromonadaceae         | Aeromonas                  |
|                                                    | Proteobacteria                | Alphaproteobacteria   | Rhizobiales                | Hyphomicrobiaceae      | Rhomicrobium               |
|                                                    | Firmicutes                    | Clostridia            | Clostridiales              | uncl Clostridiales     | Natranaerovirga            |
|                                                    | Firmicutes                    | Clostridia            | Clostridiales              | Clostridiaceae 1       | Youngiibacter              |
|                                                    | Firmicutes                    | Clostridia            | Clostridiales              | Clostridiales i.S      | Fusibacter                 |
|                                                    | Firmicutes                    | Erysipelotrichia      | Erysipelotrichales         | Erysipelotrichaceae    | uncl Erysipelotrichaceae   |
|                                                    | Actinobacteria                | Actinobacteria        | Actinomycetales            | Microbacteriaceae      | Rhodoglobus                |
|                                                    | Proteobacteria                | Gammaproteobacteria   | Oceanospirillales          | Oceanospirillales i.s. | Pseudohongiella            |
|                                                    | Actinobacteria                | Actinobacteria        | Actinomycetales            | Beutenbergiaceae       | uncl Beutenbergiaceae      |
| <b>most abundant unique in clouds</b>              | Firmicutes                    | Bacilli               | Bacillales                 | Sporolactobacillaceae  | Sporolactobacillus         |
|                                                    | Proteobacteria                | Epsilonproteobacteria | Campylobacterales          | Helicobacteraceae      | Sulfuricurvum              |
|                                                    | Proteobacteria                | Deltaproteobacteria   | Desulfovibrionales         | Desulfovibrionaceae    | Desulfovibrio              |
|                                                    | Proteobacteria                | Alphaproteobacteria   | Rhodobacterales            | Rhodobacteraceae       | Jannaschia                 |
|                                                    | Firmicutes                    | Clostridia            | Clostridiales              | Eubacteriaceae         | unclass_Eubacteriaceae     |
|                                                    | Actinobacteria                | Actinobacteria        | Actinomycetales            | Cellulomonadaceae      | Oerskovia                  |
|                                                    | Actinobacteria                | Actinobacteria        | Actinomycetales            | Microbacteriaceae      | Agromyces                  |
|                                                    | Firmicutes                    | Bacilli               | Bacillales                 | Bacillaceae 2          | Halobacillus               |
|                                                    | Proteobacteria                | Deltaproteobacteria   | Desulfobacterales          | Desulfobacteraceae     | Desulforegula              |
|                                                    | Proteobacteria                | Deltaproteobacteria   | Bdellovibrionales          | Bacterivoracaceae      | Bacterivorax               |
| <b>most common shared in air and snow</b>          | Proteobacteria                | Betaproteobacteria    | Burkholderiales            | Burkholderiales i. s.  | Tepidimonas                |
|                                                    | Proteobacteria                | Betaproteobacteria    | Burkholderiales            | Oxalobacteraceae       | Herbaspirillum             |
|                                                    | Actinobacteria                | Actinobacteria        | Bifidobacteriales          | Bifidobacteriaceae     | Bifidobacterium            |
|                                                    | Firmicutes                    | Clostridia            | Clostridiales              | Lachnospiraceae        | Coprococcus                |
|                                                    | Proteobacteria                | Gammaproteobacteria   | Enterobacteriales          | Enterobacteriaceae     | Buchnera                   |
|                                                    | Proteobacteria                | Gammaproteobacteria   | Oceanospirillales          | Oceanospirillaceae     | uncl Oceanospirillaceae    |
|                                                    | Actinobacteria                | Actinobacteria        | Actinomycetales            | Dermatophilaceae       | uncl Dermatophilaceae      |
|                                                    | Proteobacteria                | Alphaproteobacteria   | Rhodobacterales            | Rhodobacteraceae       | Thalassobius               |
|                                                    | Proteobacteria                | Gammaproteobacteria   | Pseudomonadales            | Moraxellaceae          | Moraxella                  |
|                                                    | Bacteroidetes                 | Cytophagia            | Cytophagales               | Cytophagaceae          | Emticicia                  |
| <b>most common shared in air and cloud</b>         | Firmicutes                    | Bacilli               | Bacillales                 | Alicyclobacillaceae    | Tumblebacillus             |
|                                                    | Bacteroidetes                 | Flavobacteriia        | Flavobacteriales           | Flavobacteriaceae      | Cloaciabacterium           |
|                                                    | Firmicutes                    | Bacilli               | Bacillales                 | Bacillaceae 2          | Paucisalibacillus          |
|                                                    | Firmicutes                    | Negativicutes         | Selenomonadales            | Veillonellaceae        | Negativicoccus             |
|                                                    | Proteobacteria                | Betaproteobacteria    | Burkholderiales            | Alcaligenaceae         | Advenella                  |
|                                                    | Proteobacteria                | Betaproteobacteria    | Gallionellales             | Gallionellaceae        | Gallionella                |
|                                                    | Thaumarchaeota                | uncl Thaumarchaeota   | Nitrososphaerales          | Nitrososphaeraceae     | Nitrososphaera             |
|                                                    | Firmicutes                    | Bacilli               | Bacillales                 | Bacillaceae 2          | Oceanobacillus             |
|                                                    | Proteobacteria                | Betaproteobacteria    | Burkholderiales            | Burkholderiaceae       | Cupriavidus                |
|                                                    | Firmicutes                    | Bacilli               | Lactobacillales            | Aerococcaceae          | Facklamia                  |
| <b>most abundant shared in air, snow and cloud</b> | Planctomycetes                | Planctomycetia        | Planctomycetales           | Planctomycetaceae      | Schlesneria                |
|                                                    | Proteobacteria                | Betaproteobacteria    | Burkholderiales            | Burkholderiaceae       | Burkholderia               |
|                                                    | Actinobacteria                | Actinobacteria        | Actinomycetales            | Microbacteriaceae      | Microbacterium             |
|                                                    | Verrucomicrobia               | Spartobacteria        | unclass_Spartobacteria     | unclass_Spartobacteria | Spartobacteria i.s.        |
|                                                    | Actinobacteria                | Actinobacteria        | Actinomycetales            | Micrococccaceae        | Rothia                     |
|                                                    | Proteobacteria                | Betaproteobacteria    | Burkholderiales            | Comamonadaceae         | Hydrogenophaga             |
|                                                    | Firmicutes                    | Clostridia            | Clostridiales              | Peptostreptococcaceae  | Romboutsia                 |
|                                                    | Verrucomicrobia               | Verrucomicrobiae      | Verrucomicrobiales         | Verrucomicrobiaceae    | uncl Verrucomicrobiaceae   |
|                                                    | Verrucomicrobia               | Subdivision3          | uncl Subdivision3          | uncl Subdivision3      | Subdivision3 i.s.s         |
|                                                    | Acidobacteria                 | Acidobacteria_Gp2     | uncl cidobacteria_Gp2      | uncl Acidobacteria Gp2 | Gp2                        |
| <b>all unique in rain or hail</b>                  | Proteobacteria                | Alphaproteobacteria   | Rhodobacterales            | Rhodobacteraceae       | Marivita                   |
|                                                    | Proteobacteria                | Epsilonproteobacteria | uncl Epsilonproteobacteria | Epsilonproteobacteria  | uncl Epsilonproteobacteria |
|                                                    | Proteobacteria                | Deltaproteobacteria   | Myxococcales               | Cystobacteraceae       | Cystobacter                |
|                                                    | Actinobacteria                | Actinobacteria        | Actinomycetales            | Microbacteriaceae      | Naasia                     |
|                                                    | Bacteroidetes                 | Cytophagia            | Cytophagales               | Mooreiaceae            | Mooreia                    |
|                                                    | Actinobacteria                | Actinobacteria        | Actinomycetales            | Promicromonosporaceae  | Promicromonosporaceae      |
|                                                    | Proteobacteria                | Alphaproteobacteria   | Rhodobacterales            | Rhodobacteraceae       | Marivita                   |

Table S4 Top 10 most relative abundant fungal genera in air and different precipitation types

|                                                                        | Phylum                             | Class              | Order             | Family                 | Genus                |              |
|------------------------------------------------------------------------|------------------------------------|--------------------|-------------------|------------------------|----------------------|--------------|
| <b>most abundant genera common in all</b><br>(apart from unidentified) | Ascomycota                         | Eurotiomycetes     | Chaetothyriales   | Herpotrichiellaceae    | unidentified         |              |
|                                                                        | Ascomycota                         | Eurotiomycetes     | Chaetothyriales   | Herpotrichiellaceae    | Exophiala            |              |
|                                                                        | Basidiomycota                      | Agaricomycetes     | unidentified      | unidentified           | unidentified         |              |
|                                                                        | Basidiomycota                      | Agaricomycetes     | Polyporales       | Fomitopsidaceae        | Fomitopsis           |              |
|                                                                        | Basidiomycota                      | Agaricomycetes     | Agaricales        | Strophariaceae         | Hypholoma            |              |
|                                                                        | Ascomycota                         | Eurotiomycetes     | Eurotiales        | Aspergillaceae         | Aspergillus          |              |
|                                                                        | Basidiomycota                      | Tremellomycetes    | Tremellales       | Bulleribasidiaceae     | Vishniacozyma        |              |
|                                                                        | Ascomycota                         | Lecanoromycetes    | Acarosporales     | Acarosporaceae         | Sarcogyne            |              |
|                                                                        | Basidiomycota                      | Agaricomycetes     | Agaricales        | unidentified           | unidentified         |              |
|                                                                        | Ascomycota                         | Lecanoromycetes    | Acarosporales     | Acarosporaceae         | Acarospora           |              |
|                                                                        | <b>most abundant unique in air</b> | Basidiomycota      | Agaricomycetes    | Russulales             | Stereaceae           | unidentified |
|                                                                        |                                    | Ascomycota         | Dothideomycetes   | Pleosporales           | Pleosporaceae        | Curvularia   |
|                                                                        |                                    | Basidiomycota      | Agaricomycetes    | Corticiales            | Corticaceae          | Corticium    |
| Basidiomycota                                                          |                                    | Agaricomycetes     | Polyporales       | Fomitopsidaceae        | Osteina              |              |
| Basidiomycota                                                          |                                    | Agaricomycetes     | Agaricales        | Tricholomataceae       | Clitocybe            |              |
| Basidiomycota                                                          |                                    | Agaricomycetes     | Agaricales        | Strophariaceae         | Kuehneromyces        |              |
| Ascomycota                                                             |                                    | Leotiomycetes      | Helotiales        | Dermateaceae           | Oculimacula          |              |
| Basidiomycota                                                          |                                    | Agaricomycetes     | Agaricales        | Inocybaceae            | Mallocybe            |              |
| Ascomycota                                                             |                                    | Pezizomycetes      | Pezizales         | Pyrenomataceae         | Pseudaleuria         |              |
| Ascomycota                                                             |                                    | Sordariomycetes    | Hypocreales       | Hypocreales i.s.       | Sporidesmium         |              |
| <b>most abundant unique in snow</b>                                    | Ascomycota                         | Dothideomycetes    | Myriangiales      | Myriangiales i.s.      | Phaeosclera          |              |
|                                                                        | Basidiomycota                      | GS27               | unidentified      | unidentified           | unidentified         |              |
|                                                                        | Basidiomycota                      | Agaricomycetes     | Russulales        | Russulaceae            | Lactifluus           |              |
|                                                                        | Ascomycota                         | Lecanoromycetes    | Caliciales        | Physciaceae            | Phaeophyscia         |              |
|                                                                        | Ascomycota                         | Orbiliomycetes     | Orbiliiales       | Orbiliaceae            | unidentified         |              |
|                                                                        | Ascomycota                         | Pezizomycetes      | Pezizales         | Pyrenomataceae         | Cheilymenia          |              |
|                                                                        | Ascomycota                         | Leotiomycetes      | Helotiales        | Dermateaceae           | Neofabraea           |              |
|                                                                        | Ascomycota                         | Dothideomycetes    | Pleosporales      | Pleosporales i.s.      | Mondocitrys          |              |
|                                                                        | Chlorophyta                        | Trebouxiophyceae   | Trebouxiiales     | Trebouxiaceae          | Trebouxia            |              |
|                                                                        | Ascomycota                         | Leotiomycetes      | Helotiales        | Helotiales i.s.        | Mycocarthritis       |              |
| <b>most abundant unique in clouds</b>                                  | Ascomycota                         | Dothideomycetes    | Pleosporales      | Pleosporales i.s.      | Phaeomycocentrospora |              |
|                                                                        | Ascomycota                         | Lecanoromycetes    | Lecanorales       | Pilocarpaceae          | Byssolema            |              |
|                                                                        | Basidiomycota                      | Microbotryomycetes | Sporidiobolales   | Sporidiobolaceae       | Rhodosporeidiobolus  |              |
|                                                                        | Ascomycota                         | Lecanoromycetes    | Trapeliales       | Trapeliaceae           | Trapelia             |              |
|                                                                        | Ascomycota                         | unidentified       | unidentified      | unidentified           | unidentified         |              |
|                                                                        | Basidiomycota                      | Agaricomycetes     | Agaricales        | Agaricaceae            | Lepiota              |              |
|                                                                        | Ascomycota                         | Leotiomycetes      | Helotiales        | Sclerotiniaceae        | Sclerotinia          |              |
|                                                                        | Ascomycota                         | Lecanoromycetes    | Lecanorales       | Lecanoraceae           | Protoparmeliopsis    |              |
|                                                                        | Ascomycota                         | Lecanoromycetes    | Ostropales        | Stictiaceae            | Cryptodiscus         |              |
|                                                                        | Basidiomycota                      | Agaricomycetes     | Polyporales       | Meruliaceae            | Ceraceomyces         |              |
| <b>most common shared in air and snow</b>                              | Basidiomycota                      | Agaricomycetes     | Agaricales        | Entolomataceae         | Entoloma             |              |
|                                                                        | Ascomycota                         | Lecanoromycetes    | Lecanorales       | Parmeliaceae           | Protoparmelia        |              |
|                                                                        | Ascomycota                         | Eurotiomycetes     | Eurotiales        | Trichocomaceae         | Talaromyces          |              |
|                                                                        | Ascomycota                         | Lecanoromycetes    | Lecanorales       | unidentified           | unidentified         |              |
|                                                                        | Basidiomycota                      | Agaricomycetes     | Agaricales        | Tricholomataceae       | Xeromphalina         |              |
|                                                                        | Basidiomycota                      | Agaricomycetes     | Boletales         | Coniophoraceae         | Coniophora           |              |
|                                                                        | Basidiomycota                      | Agaricomycetes     | Polyporales       | Meripilaceae           | Climacocystis        |              |
|                                                                        | Ascomycota                         | Leotiomycetes      | Helotiales        | Dermateaceae           | Cryptosporidiopsis   |              |
|                                                                        | Basidiomycota                      | Agaricomycetes     | Polyporales       | Meruliaceae            | Scopuloides          |              |
|                                                                        | Basidiomycota                      | Agaricomycetes     | Hymenochaetales   | Schizophoraceae        | unidentified         |              |
| <b>most common shared in air and cloud</b>                             | Basidiomycota                      | Agaricomycetes     | Auriculariales    | Exidiaceae             | Exidia               |              |
|                                                                        | Basidiomycota                      | Agaricomycetes     | Polyporales       | Polyporaceae           | Rhodonia             |              |
|                                                                        | Basidiomycota                      | Agaricomycetes     | Agaricales        | Lycoperdaceae          | Bovista              |              |
|                                                                        | Ascomycota                         | Pezizomycetes      | Pezizales         | Sarcosomataceae        | Pseudoplectania      |              |
|                                                                        | Ascomycota                         | Leotiomycetes      | Helotiales        | Helotiales i.s.        | Rhexocercosporidium  |              |
|                                                                        | Ascomycota                         | Leotiomycetes      | Helotiales        | Helotiaceae            | Hymenoscyphus        |              |
|                                                                        | Ascomycota                         | Dothideomycetes    | Capnodiales       | Cladosporiaceae        | Cladosporium         |              |
|                                                                        | Ascomycota                         | Sordariomycetes    | Sordariales       | Chaetomiaceae          | Dichotomopilus       |              |
|                                                                        | Basidiomycota                      | Agaricomycetes     | Agaricales        | Psathyrellaceae        | Coprinellus          |              |
|                                                                        | Basidiomycota                      | Agaricomycetes     | Agaricales        | Tricholomataceae       | Gamundia             |              |
| <b>most abundant shared in air, snow and cloud</b>                     | Basidiomycota                      | Wallemiomycetes    | Wallemiales       | Wallemiaceae           | Wallemia             |              |
|                                                                        | Basidiomycota                      | Tremellomycetes    | Filobasidiales    | Filobasidiaceae        | Filobasidium         |              |
|                                                                        | Ascomycota                         | Eurotiomycetes     | Eurotiales        | Aspergillaceae         | unidentified         |              |
|                                                                        | Basidiomycota                      | Tremellomycetes    | Holtermanniales   | Holtermanniales i.s.   | Holtermanniella      |              |
|                                                                        | Ascomycota                         | Saccharomycetes    | Saccharomycetales | Saccharomycetales i.s. | Candida              |              |
|                                                                        | Ascomycota                         | Saccharomycetes    | Saccharomycetales | Saccharomycetales      | Saccharomyces        |              |
|                                                                        | Ascomycota                         | Saccharomycetes    | Saccharomycetales | Dipodasceae            | unidentified         |              |
|                                                                        | Basidiomycota                      | Agaricomycetes     | Russulales        | Bondarzewiaceae        | Heterobasidion       |              |
|                                                                        | Basidiomycota                      | Agaricomycetes     | Polyporales       | Meruliaceae            | Bjerkandera          |              |
|                                                                        | Basidiomycota                      | Agaricomycetes     | Hymenochaetales   | Schizophoraceae        | Xylodon              |              |
| <b>all unique in rain or hail</b>                                      | Basidiomycota                      | Agaricomycetes     | Agaricales        | Omphalotaceae          | Gymnopus             |              |
|                                                                        | Basidiomycota                      | Agaricomycetes     | Agaricales        | Tricholomataceae       | Resupinatus          |              |
|                                                                        | Basidiomycota                      | Agaricomycetes     | Russulales        | Peniophoraceae         | Peniophora           |              |
|                                                                        | Basidiomycota                      | Microbotryomycetes | Microbotryales    | Microbotryaceae        | Microbotryum         |              |
|                                                                        | Basidiomycota                      | Agaricomycetes     | Polyporales       | Fomitopsidaceae        | Auriporia            |              |
|                                                                        | Basidiomycota                      | Agaricomycetes     | Polyporales       | Ganodermataceae        | Ganoderma            |              |
|                                                                        | Ascomycota                         | Pezizomycetes      | Pezizales         | Pyrenomataceae         | Trichophaea          |              |
|                                                                        | Basidiomycota                      | Agaricomycetes     | Russulales        | Gloeocystidiellaceae   | Laxitextum           |              |

Table S5 ANOSIM, ADONIS, pairwise PERMANOVA for seasonal air and air vs. precipitation

|                                   | Bacteria |         |                |              |              | Fungi |         |                |              |              |
|-----------------------------------|----------|---------|----------------|--------------|--------------|-------|---------|----------------|--------------|--------------|
| Air Time Series by Seasons        | Df       | F-Model | R <sup>2</sup> | p            |              | Df    | F-Model | R <sup>2</sup> | p            |              |
| ADONIS                            | 3        | 2.909   | 0.166          | <b>0.001</b> |              | 3     | 5.7253  | 0.30757        | <b>0.001</b> |              |
| ANOSIM                            |          |         | 0.114          | <b>0.001</b> |              |       |         | 0.5225         | <b>0.001</b> |              |
| Permanova air seasons             | Df       | F-Model | R <sup>2</sup> | p            | adj. p       | Df    | F-Model | R <sup>2</sup> | p            | adj. p       |
| Feb vs. May                       |          | 3.182   | 0.122          | <b>0.001</b> | <b>0.006</b> | 20    | 3.173   | 0.143          | <b>0.001</b> | <b>0.006</b> |
| Feb vs. Aug                       |          | 2.658   | 0.112          | <b>0.001</b> | <b>0.006</b> | 22    | 6.921   | 0.248          | <b>0.001</b> | <b>0.006</b> |
| Feb vs. Nov                       |          | 1.898   | 0.079          | <b>0.023</b> | 0.102        | 22    | 4.084   | 0.163          | <b>0.001</b> | <b>0.006</b> |
| May vs. Aug                       |          | 1.454   | 0.062          | <b>0.038</b> | 0.234        | 19    | 3.484   | 0.162          | <b>0.001</b> | <b>0.006</b> |
| May vs. Nov                       |          | 4.606   | 0.167          | <b>0.001</b> | <b>0.006</b> | 19    | 6.411   | 0.263          | <b>0.001</b> | <b>0.006</b> |
| Aug vs. Nov                       |          | 3.842   | 0.155          | <b>0.001</b> | <b>0.006</b> | 21    | 12.979  | 0.394          | <b>0.001</b> | <b>0.006</b> |
| Air Time Series vs. Precipitation | Df       | F-Model | R <sup>2</sup> | p            |              | Df    | F-Model | R <sup>2</sup> | p            |              |
| ADONIS                            | 1        | 9.1949  | 0.11187        | 0.001        |              | 1     | 5.1743  | 0.1076         | 0.008        |              |
| ANOSIM                            |          |         | 0.3004         | 0.001        |              |       |         | 0.06976        | 0.001        |              |
| Permanova air vs precipitation    | Df       | F-Model | R <sup>2</sup> | p            | adj. p       | Df    | F-Model | R <sup>2</sup> | p            | adj. p       |
| Air vs. Snow                      | 62       | 8.136   | 0.118          | <b>0.001</b> | <b>0.01</b>  | 58    | 4.269   | 0.069          | <b>0.001</b> | <b>0.01</b>  |
| Air vs. Cloud                     | 56       | 3.979   | 0.067          | <b>0.001</b> | <b>0.01</b>  | 51    | 2.794   | 0.053          | <b>0.001</b> | <b>0.01</b>  |
| Air vs. Rain                      | 49       | 1.311   | 0.027          | 0.084        | 0.84         | 44    | 1.602   | 0.036          | <b>0.046</b> | 0.46         |
| Air vs. Hail                      | 48       | 1.377   | 0.028          | <b>0.022</b> | 0.22         | 43    | 1.085   | 0.025          | 0.389        | 1.00         |
| Snow vs. Cloud                    | 23       | 1.349   | 0.058          | 0.114        | 1.00         | 24    | 1.083   | 0.045          | 0.310        | 1.00         |
| Snow vs. Rain                     | 16       | 2.646   | 0.150          | <b>0.025</b> | 0.25         | 17    | 2.103   | 0.116          | <b>0.004</b> | <b>0.04</b>  |
| Snow vs. Hail                     | 15       | 2.353   | 0.144          | 0.074        | 0.74         | 16    | 2.269   | 0.064          | 0.459        | 1.00         |
| Cloud vs. Rain                    | 10       | 1.918   | 0.176          | 0.060        | 0.60         | 10    | 2.269   | 0.201          | 0.055        | 0.55         |
| Cloud vs. Hail                    | 9        | 1.539   | 0.161          | 0.229        | 1.00         | 9     | 1.142   | 0.125          | 0.289        | 1.00         |
| Rain vs. Hail                     | 2        | 0.960   | 0.490          | 1.000        | 1.00         | 2     | 0.972   | 0.493          | 1.000        | 1.00         |
| Permanova Feb                     | Df       | F-Model | R <sup>2</sup> | p            | adj. p       |       | F-Model | R <sup>2</sup> | p            | adj. p       |
| Air vs. Snow                      |          | 4.5601  | 0.2115         | <b>0.001</b> | <b>0.003</b> | 20    | 4.6699  | 0.1972         | <b>0.002</b> | <b>0.006</b> |
| Air vs. Cloud                     |          | 1.7853  | 0.1295         | <b>0.003</b> | <b>0.009</b> | 13    | 2.2108  | 0.1555         | <b>0.028</b> | 0.084        |
| Snow vs. Cloud                    |          | 1.0121  | 0.1263         | 0.420        | 1.000        | 10    | 1.1275  | 0.1113         | 0.339        | 1.000        |
| May                               | Df       | F-Model | R <sup>2</sup> | p            | adj. p       |       | F-Model | R <sup>2</sup> | p            | adj. p       |
| Air vs. Snow                      |          | 2.3074  | 0.1507         | <b>0.018</b> | 0.054        | 9     | 0.9025  | 0.1013         | 1.000        | 1.000        |
| Air vs. Cloud                     |          | 1.9995  | 0.1176         | <b>0.016</b> | <b>0.048</b> | 12    | 1.5203  | 0.1214         | <b>0.008</b> | <b>0.024</b> |
| Snow vs. Cloud                    |          | 0.9662  | 0.1945         | 0.566        | 1.000        | 4     | 0.6692  | 0.1823         | 0.600        | 1.000        |
| Aug                               | Df       | F-Model | R <sup>2</sup> | p            | adj. p       |       | F-Model | R <sup>2</sup> | p            | adj. p       |
| Air vs. Rain                      |          | 1.3870  | 0.1119         | <b>0.026</b> | 0.156        | 12    | 2.0425  | 0.1566         | <b>0.011</b> | 0.066        |
| Air vs. Snow                      |          | 2.2691  | 0.1710         | <b>0.016</b> | 0.096        | 12    | 2.4817  | 0.1841         | <b>0.017</b> | 0.102        |
| Air vs. Hail                      |          | 1.5425  | 0.1336         | 0.092        | 0.552        | 11    | 1.3986  | 0.1227         | 0.078        | 0.468        |
| Rain vs. Snow                     |          | 1.2821  | 0.3906         | 0.666        | 1.000        | 3     | 1.6087  | 0.4457         | 0.333        | 1.000        |
| Rain vs. Hail                     |          | 0.9605  | 0.4899         | 1.000        | 1.000        | 2     | 0.9723  | 0.4929         | 1.000        | 1.000        |
| Snow vs. Hail                     |          | 2.0548  | 0.6726         | 0.333        | 1.000        | 2     | 0.7069  | 0.7069         | 0.333        | 1.000        |
| Nov                               | Df       | F-Model | R <sup>2</sup> | p            | adj. p       |       | F-Model | R <sup>2</sup> | p            | adj. p       |
| Air vs. Snow                      |          | 5.5934  | 0.2854         | <b>0.001</b> | <b>0.003</b> | 14    | 10.1072 | 0.4373         | <b>0.001</b> | <b>0.003</b> |
| Air vs. Cloud                     |          | 4.5066  | 0.2574         | <b>0.003</b> | <b>0.009</b> | 13    | 10.7139 | 0.4716         | <b>0.003</b> | <b>0.009</b> |
| Snow vs. Cloud                    |          | 1.8082  | 0.2655         | 0.062        | 0.186        | 6     | 1.6525  | 0.2484         | 0.060        | 0.180        |

Table S6 Kruskal-Wallis test on seasonal air abundance and alpha diversity

| Kruskal-Wallis<br>air_season | ~ | X <sup>2</sup> | df | p      |
|------------------------------|---|----------------|----|--------|
| Chao1_bact                   |   | 8.7592         | 3  | 0.03   |
| Shannon_bact                 |   | 13.7826        | 3  | <0.001 |
| Chao1_fung                   |   | 31.8353        | 3  | <0.001 |
| Shannon_fung                 |   | 31.5384        | 3  | <0.001 |
| 16S_m3                       |   | 13.2582        | 3  | <0.001 |
| 18S_m3                       |   | 36.1461        | 3  | <0.001 |
| 16S:18S ratio                |   | 36.2621        | 3  | <0.001 |

Table S7 Dunns pairwise post-hoc test for seasonal air abundance and alpha diversity, p-values were corrected for multiple testing with Bonferroni method (unadjusted values in brackets)

| DunnTest<br>pairwise<br>comparison<br>~ air seasons | Bonferroni p (unadjusted p)          |                                      |                                      | Bonferroni p (unadjusted p) |                                       |                                          |
|-----------------------------------------------------|--------------------------------------|--------------------------------------|--------------------------------------|-----------------------------|---------------------------------------|------------------------------------------|
|                                                     | May                                  | Aug                                  | Nov                                  | May                         | Aug                                   | Nov                                      |
| <b>Chao1_bact</b>                                   |                                      |                                      |                                      | <b>Chao1_fung</b>           |                                       |                                          |
| <b>Aug</b>                                          | 1.0000<br>(0.2016)                   |                                      |                                      | <b>Aug</b>                  | <b>0.0000*</b><br>( <b>0.000*</b> )   |                                          |
| <b>Nov</b>                                          | 0.1381<br><b>0.0230*</b>             | <b>0.0160*</b><br><b>0.0027*</b>     |                                      | <b>Nov</b>                  | <b>0.0085*</b><br>( <b>0.0014*</b> )  | <b>0.0177*</b><br>( <b>0.0030*</b> )     |
| <b>Feb</b>                                          | 0.9885<br>0.1647                     | 0.2205<br><b>0.0368*</b>             | 0.9235<br>0.1539                     | <b>Feb</b>                  | <b>0.0313*</b><br>( <b>0.0052*</b> )  | 1.0000<br>(0.3053)                       |
| <b>Shannon_bact</b>                                 |                                      |                                      |                                      | <b>Shannon_fung</b>         |                                       |                                          |
| <b>Aug</b>                                          | 1.0000<br>(0.4905)                   |                                      |                                      | <b>Aug</b>                  | <b>0.0000*</b><br>( <b>0.0000*</b> )  |                                          |
| <b>Nov</b>                                          | 0.6013<br>(0.1002)                   | 0.6580<br>(0.1097)                   |                                      | <b>Nov</b>                  | <b>0.0440*</b><br>( <b>0.0073*</b> )  | <b>0.0033*</b><br>( <b>0.0006*</b> )     |
| <b>Feb</b>                                          | <b>0.0035*</b><br>( <b>0.0006*</b> ) | <b>0.0049*</b><br>( <b>0.0008*</b> ) | 0.1482<br>( <b>0.0247*</b> )         | <b>Feb</b>                  | <b>0.0487*</b><br>( <b>9.0081*</b> )  | 1.0000<br>( <b>0.0003*</b> )<br>(0.4649) |
| <b>16S_m-3</b>                                      |                                      |                                      |                                      | <b>18S_m-3</b>              |                                       |                                          |
| <b>Aug</b>                                          | 1.0000<br>(0.4356)                   |                                      |                                      | <b>Aug</b>                  | <b>0.0013*</b><br>( <b>0.0002*</b> )  |                                          |
| <b>Nov</b>                                          | 0.1096<br>( <b>0.0183*</b> )         | 0.1947<br>( <b>0.0324*</b> )         |                                      | <b>Nov</b>                  | <b>0.00000*</b><br>( <b>0.0000*</b> ) | 0.0973<br>( <b>0.0162*</b> )             |
| <b>Feb</b>                                          | 0.3212<br>(0.0535)                   | 0.2648<br>( <b>0.0441*</b> )         | <b>0.0008*</b><br>( <b>0.0001*</b> ) | <b>Feb</b>                  | 0.1212<br>( <b>0.0202*</b> )          | 0.4142<br>(0.0690)                       |
| <b>16S:18S ratio</b>                                |                                      |                                      |                                      |                             |                                       |                                          |
| <b>Aug</b>                                          | <b>0.0003*</b><br>( <b>0.0000*</b> ) |                                      |                                      |                             |                                       |                                          |
| <b>Nov</b>                                          | <b>0.0000*</b><br>( <b>0.0000*</b> ) | 0.2357<br>( <b>0.0393*</b> )         |                                      |                             |                                       |                                          |
| <b>Feb</b>                                          | <b>0.0117*</b><br>( <b>0.0020*</b> ) | 0.8234<br>(0.1372)                   | <b>0.0106*</b><br>( <b>0.0018*</b> ) |                             |                                       |                                          |

Table S8 Kruskal-Wallis test of air and precipitation abundance and alpha diversity

| Kruskal-Wallis precipitation | ~ | X <sup>2</sup> | df | p      |
|------------------------------|---|----------------|----|--------|
| Chao1_bact                   |   | 40.9905        | 4  | <0.001 |
| Shannon_bact                 |   | 30.9896        | 4  | <0.001 |
| Chao1_fung                   |   | 37.0995        | 4  | <0.001 |
| Shannon_fung                 |   | 25.6239        | 4  | <0.001 |
| 16S_m3                       |   | 24.1046        | 4  | 0.001  |
| 18S_m3                       |   | 14.7244        | 4  | 0.01   |
| 16S:18S ratio                |   | 35.2831        | 4  | <0.001 |

Table S9 Dunns pairwise post-hoc test on air and precipitation abundance and alpha diversity, p-values were corrected for multiple testing with Bonferroni method (unadjusted values in brackets)

| DunnTest pairwise comparison | Bonferroni p (unadjusted p)          |                                      |                                     |                                      |              | Bonferroni p (unadjusted p)          |                              |                              |                              |
|------------------------------|--------------------------------------|--------------------------------------|-------------------------------------|--------------------------------------|--------------|--------------------------------------|------------------------------|------------------------------|------------------------------|
|                              | Air_seas                             | Cloud                                | Hail                                | Rain                                 |              | Air_seas                             | Cloud                        | Hail                         | Rain                         |
| -Precipitation               |                                      |                                      |                                     |                                      |              |                                      |                              |                              |                              |
| Chao1_bact                   |                                      |                                      |                                     |                                      | Chao1_fung   |                                      |                              |                              |                              |
| Cloud                        | <b>0.0027*</b><br>( <b>0.0003*</b> ) |                                      |                                     |                                      | Cloud        | <b>0.0000*</b><br>( <b>0.0000*</b> ) |                              |                              |                              |
| Hail                         | 1.0000<br>(0.1031)                   | 1.0000<br>(0.4823)                   |                                     |                                      | Hail         | 0.3097<br>( <b>0.0310</b> )          | 1.0000<br>(0.4032)           |                              |                              |
| Rain                         | 1.0000<br>(0.1087)                   | <b>0.0254</b><br>( <b>0.0025*</b> )  | 0.3834<br>( <b>0.0383</b> )         |                                      | Rain         | 1.0000<br>(0.3492)                   | 0.0727<br>( <b>0.0073*</b> ) | 0.3831<br>( <b>0.0383</b> )  |                              |
| Snow                         | <b>0.0000*</b><br>( <b>0.0000*</b> ) | 1.0000<br>(0.2321)                   | 1.0000<br>(0.3609)                  | <b>0.0038*</b><br>( <b>0.0004*</b> ) | Snow         | <b>0.0000*</b><br>( <b>0.0000*</b> ) | 1.0000<br>(0.2573)           | 1.0000<br>(0.3035)           | 0.1445<br>( <b>0.0145*</b> ) |
| Shannon_bact                 |                                      |                                      |                                     |                                      | Shannon_fung |                                      |                              |                              |                              |
| Cloud                        | <b>0.0535</b><br>( <b>0.0054*</b> )  |                                      |                                     |                                      | Cloud        | <b>0.0090*</b><br>( <b>0.0009*</b> ) |                              |                              |                              |
| Hail                         | 1.0000<br>(0.1134)                   | 0.1914<br>( <b>0.0191*</b> )         |                                     |                                      | Hail         | 1.0000<br>(0.1291)                   | 1.0000<br>(0.5000)           |                              |                              |
| Rain                         | 1.0000<br>(0.3027)                   | 0.4395<br>( <b>0.0440</b> )          | 1.0000<br>(0.2443)                  |                                      | Rain         | 1.0000<br>(0.1675)                   | 0.0925<br>( <b>0.0093*</b> ) | 0.6637<br>(0.0664)           |                              |
| Snow                         | <b>0.0000*</b><br>( <b>0.0000*</b> ) | 1.0000<br>(0.1320)                   | <b>0.0464</b><br>( <b>0.0046*</b> ) | <b>0.0731</b><br>( <b>0.0073*</b> )  | Snow         | <b>0.0001*</b><br>( <b>0.0000*</b> ) | 1.0000<br>(0.4251)           | 1.0000<br>(0.4696)           | 0.0523<br>( <b>0.0052*</b> ) |
| 16S_m-3                      |                                      |                                      |                                     |                                      | 18S_m-3      |                                      |                              |                              |                              |
| Cloud                        | <b>0.0012*</b><br>( <b>0.0001*</b> ) |                                      |                                     |                                      | Cloud        | 0.0928<br>( <b>0.0093*</b> )         |                              |                              |                              |
| Hail                         | 0.8228<br>(0.0823)                   | 9.0403<br>( <b>0.004*</b> )          |                                     |                                      | Hail         | 0.2533<br>( <b>0.0253</b> )          | 1.0000<br>(0.1553)           |                              |                              |
| Rain                         | 0.3920<br>( <b>0.0392</b> )          | <b>0.0036*</b><br>( <b>0.0004*</b> ) | 1.000<br>( <b>0.04564</b> )         |                                      | Rain         | 1.0000<br>(0.2471)                   | 0.3909<br>( <b>0.0391</b> )  | 0.2195<br>( <b>0.0219*</b> ) |                              |
| Snow                         | 0.0832<br>( <b>0.0083*</b> )         | 0.3991<br>( <b>0.0399</b> )          | 0.2216<br>( <b>0.0222*</b> )        | <b>0.0477</b><br>( <b>0.0048*</b> )  | Snow         | <b>0.0375</b><br>( <b>0.0038*</b> )  | 1.0000<br>(0.3680)           | 1.0000<br>(0.1179)           | 0.4753<br>( <b>0.0475</b> )  |
| 16S:18S ratio                |                                      |                                      |                                     |                                      |              |                                      |                              |                              |                              |
| Cloud                        | <b>0.0001*</b><br>( <b>0.0000*</b> ) |                                      |                                     |                                      |              |                                      |                              |                              |                              |
| Hail                         | 0.3696<br>( <b>0.0370</b> )          | 1.0000<br>(0.4280)                   |                                     |                                      |              |                                      |                              |                              |                              |
| Rain                         | 0.7339<br>( <b>0.0734</b> )          | <b>0.0038*</b><br>( <b>0.0004*</b> ) | 0.0992<br>( <b>0.0099*</b> )        |                                      |              |                                      |                              |                              |                              |
| Snow                         | <b>0.0002*</b><br>( <b>0.0000*</b> ) | 1.0000<br>(0.1430)                   | 1.0000<br>(0.2638)                  | <b>0.0161*</b><br>( <b>0.0016*</b> ) |              |                                      |                              |                              |                              |

Table S10 Sequence statistics for bacterial genera and fungal OTU dataset

|                                        | <b>Bacteria</b> | <b>Fungi</b>       |
|----------------------------------------|-----------------|--------------------|
| <b>#mean raw sequences per sample</b>  | 27680+-14202.5  | 17603.28+-17035.77 |
| <b>Genera/OTUs raw dataset</b>         | 1590            | 2573               |
| <b>Genera/OTUs after blank removal</b> | 963             | 1912               |
| <b>Merged on genus level</b>           |                 | 603                |

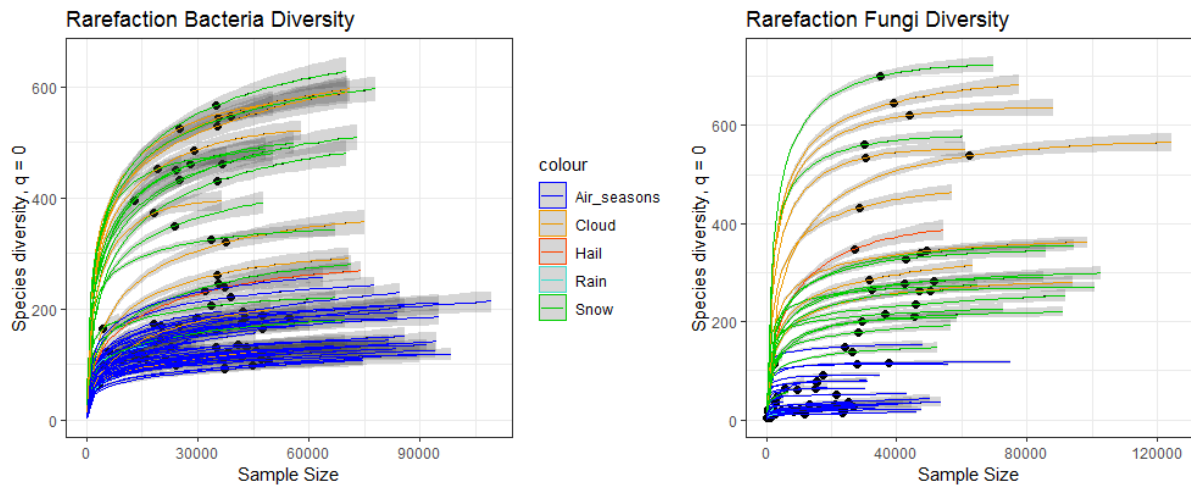

Figure S1 Rarefaction curves for bacterial and fungal dataset



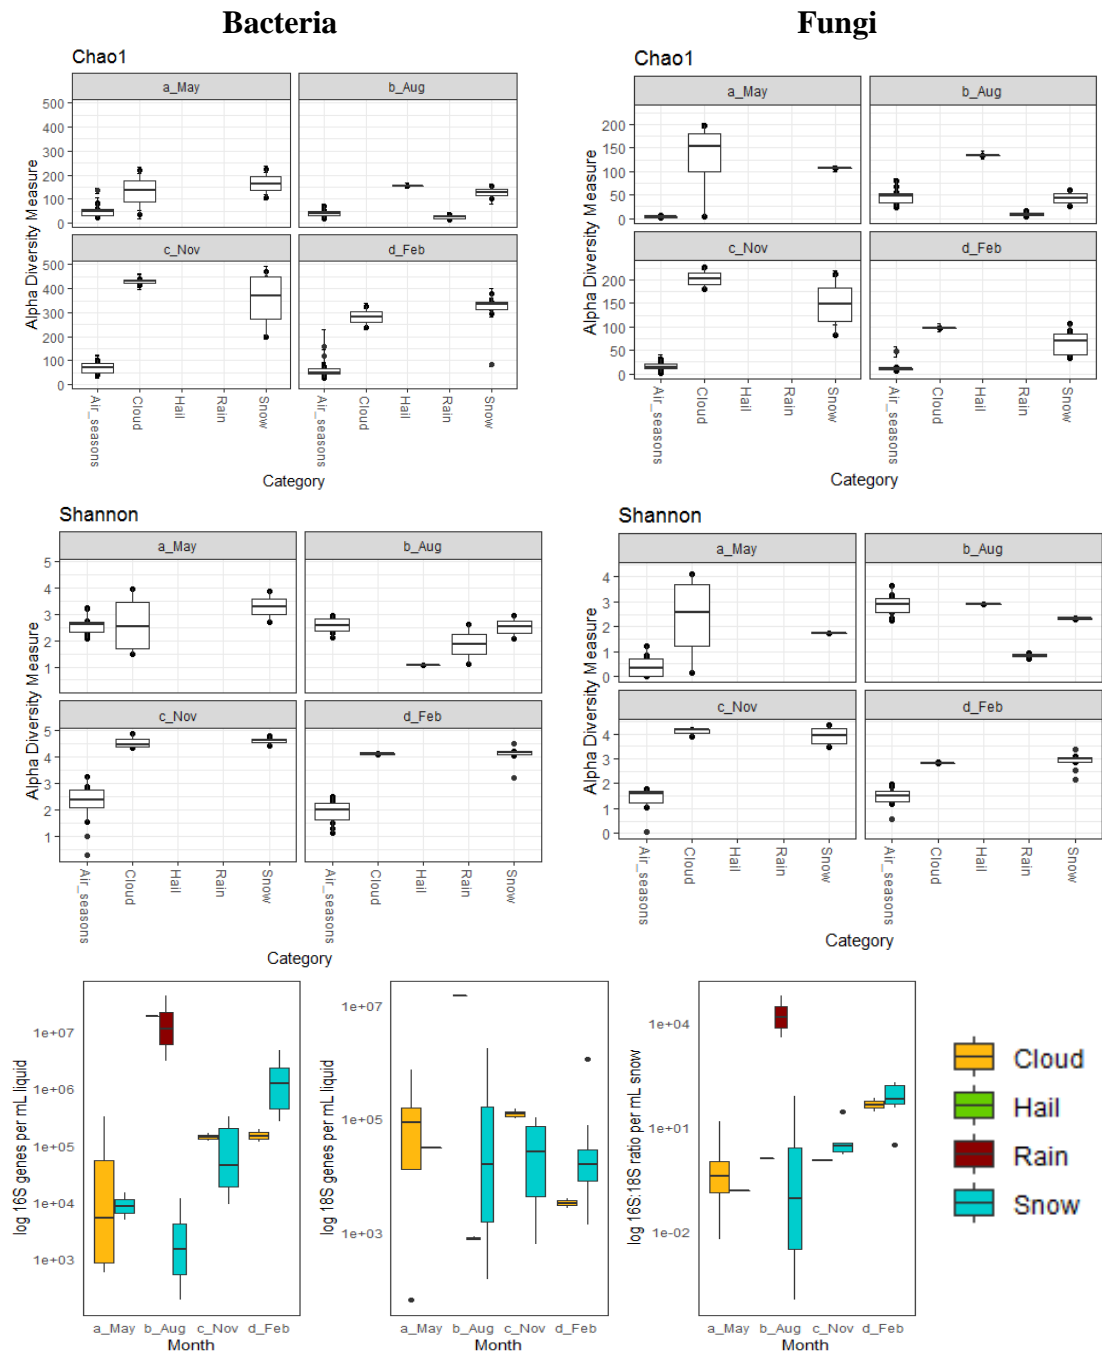

Figure S2 Alpha diversity and abundance for air and precipitation by season

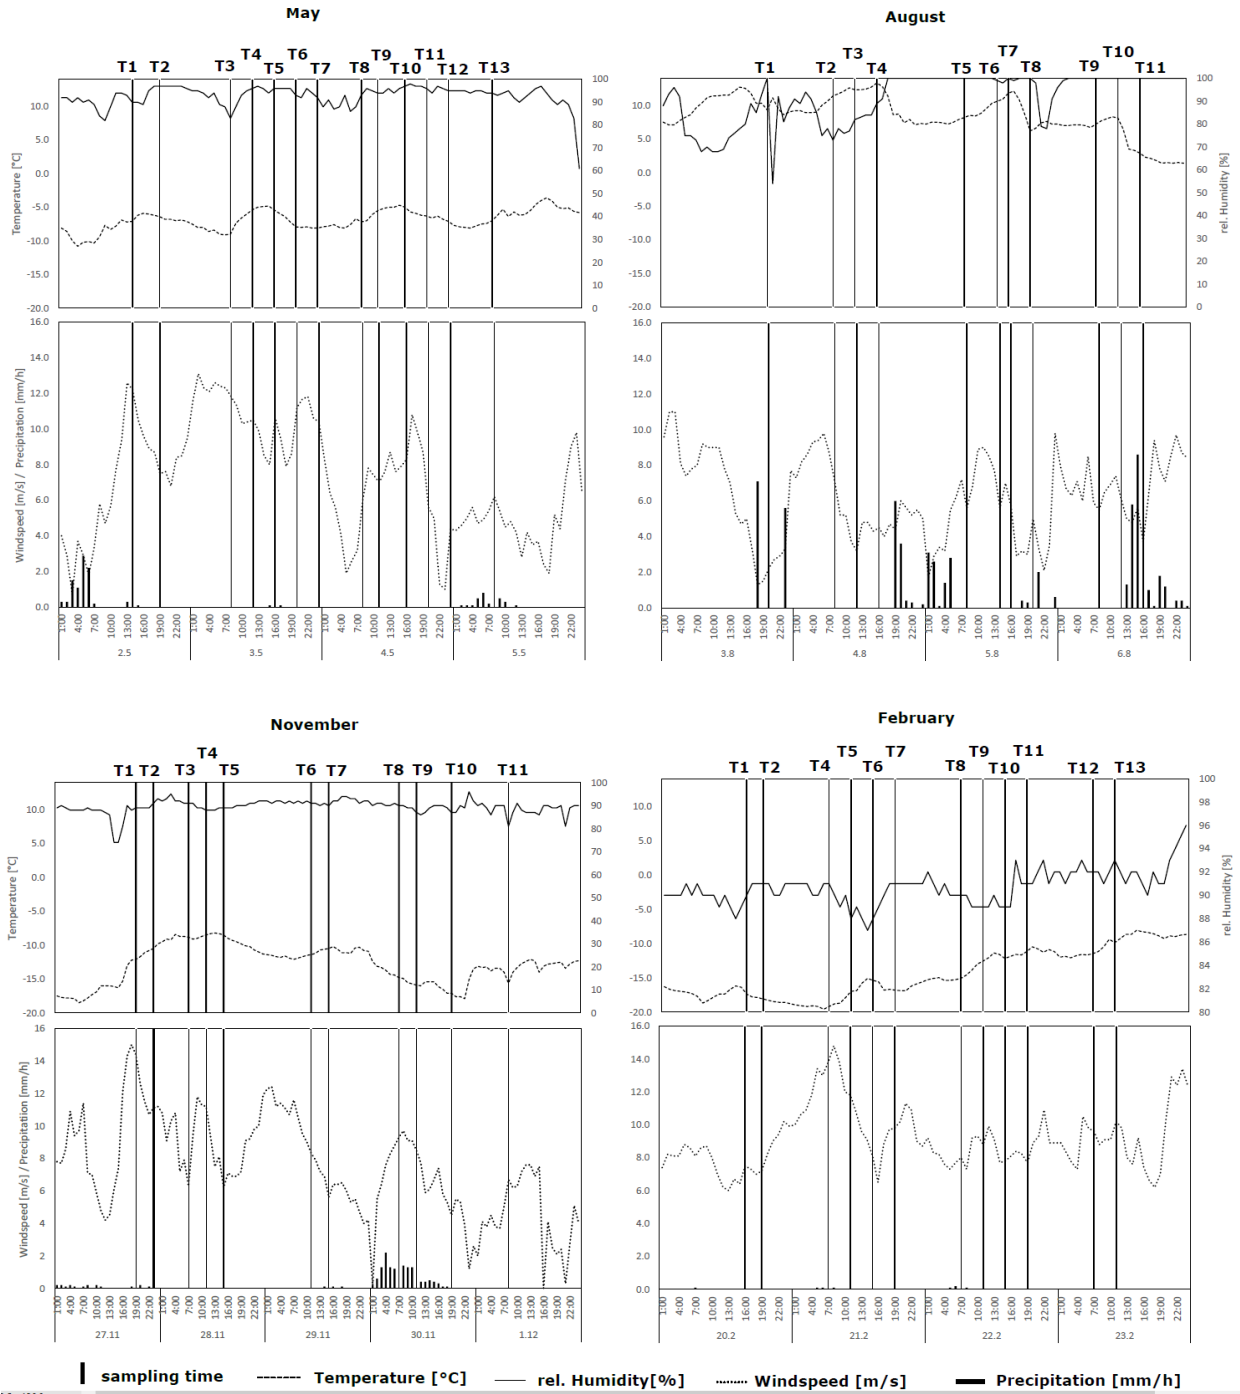

Figure S3 Mean meteorological values of temperature (dashed line), rel.humidity (continuous line), windspeed (dotted line) and precipitation (bars) for the sample periods derived from hourly values, vertical lines indicate sample times (source: ZAMG)

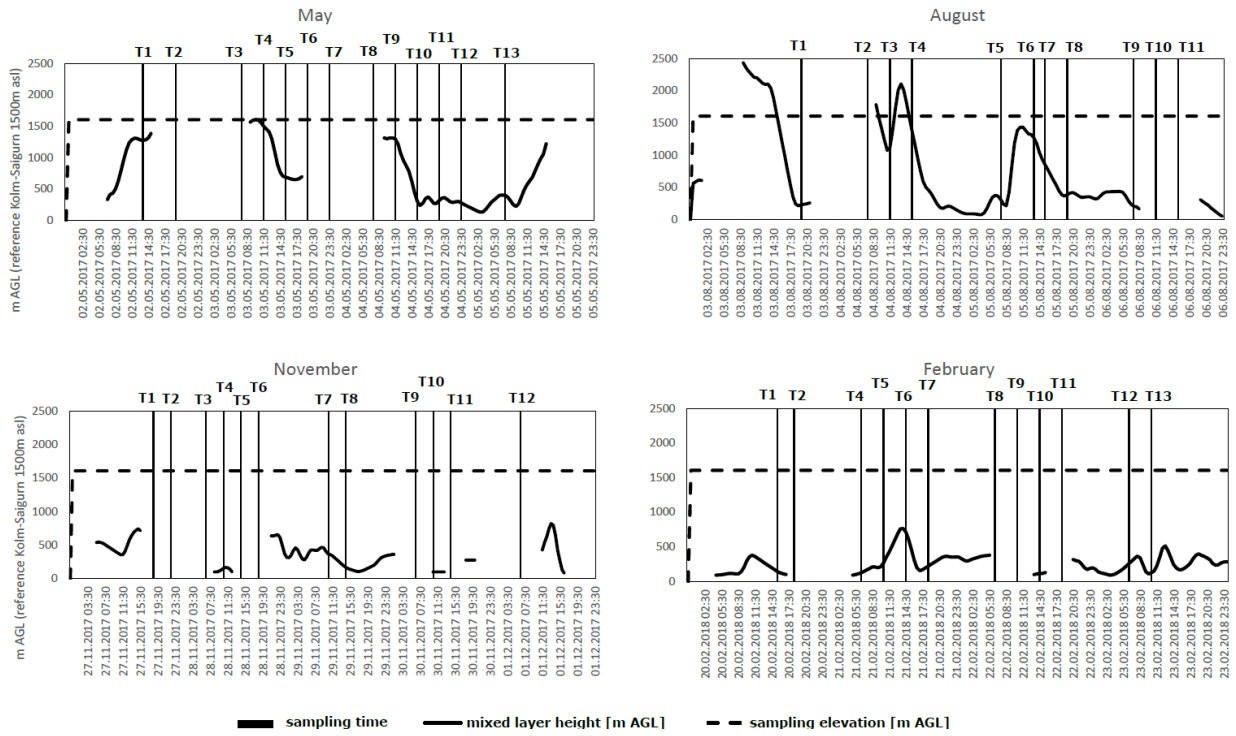

Figure S4 Location of planetary boundary layer above ground level, measured at Kolm-Saigurn (1500m asl) and respective sample times (vertical lines), dashed line indicates the elevation of the sampling location (i.e. Sonnblick Observatory)

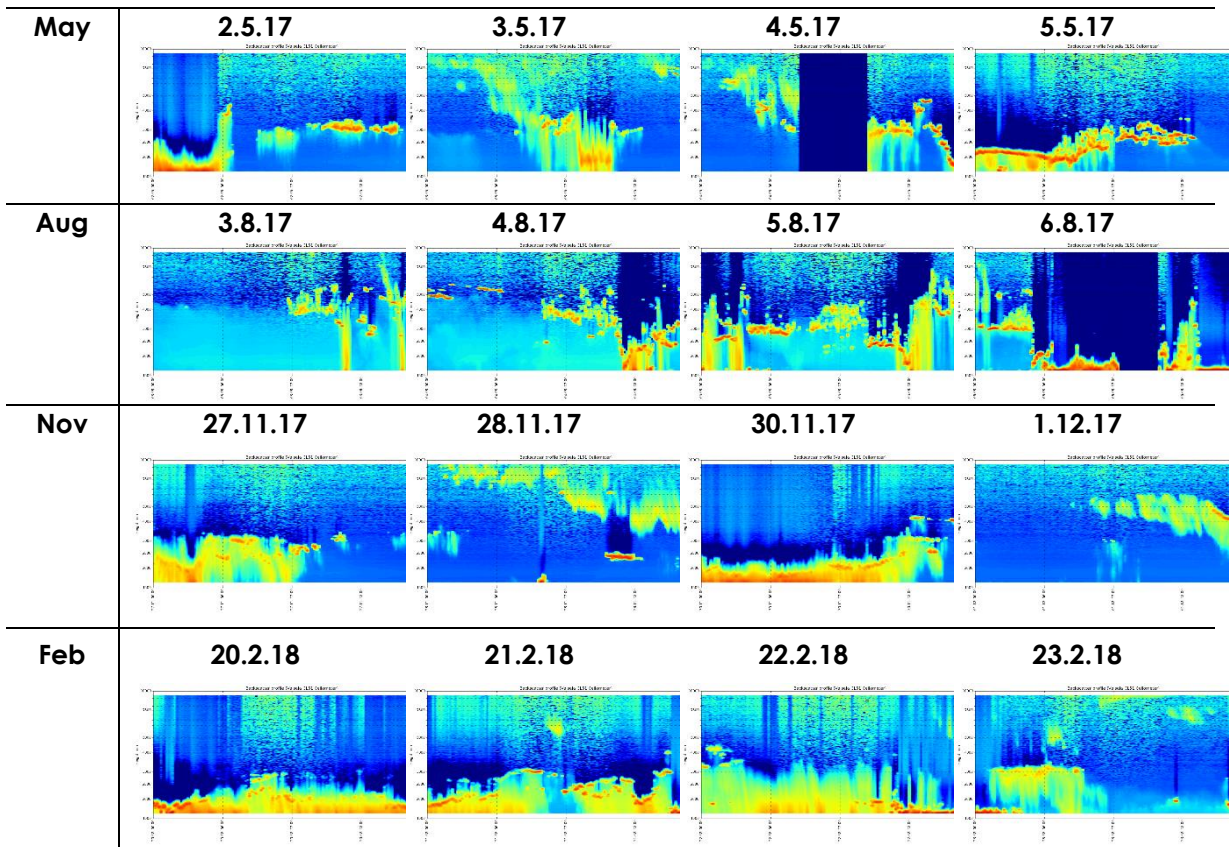

Figure S5 Backscatter ceilometer data of the respective sampling days in Kolm-Saigurn (1500m asl), red color indicates high particle concentration, blue colours indicate low particle concentration

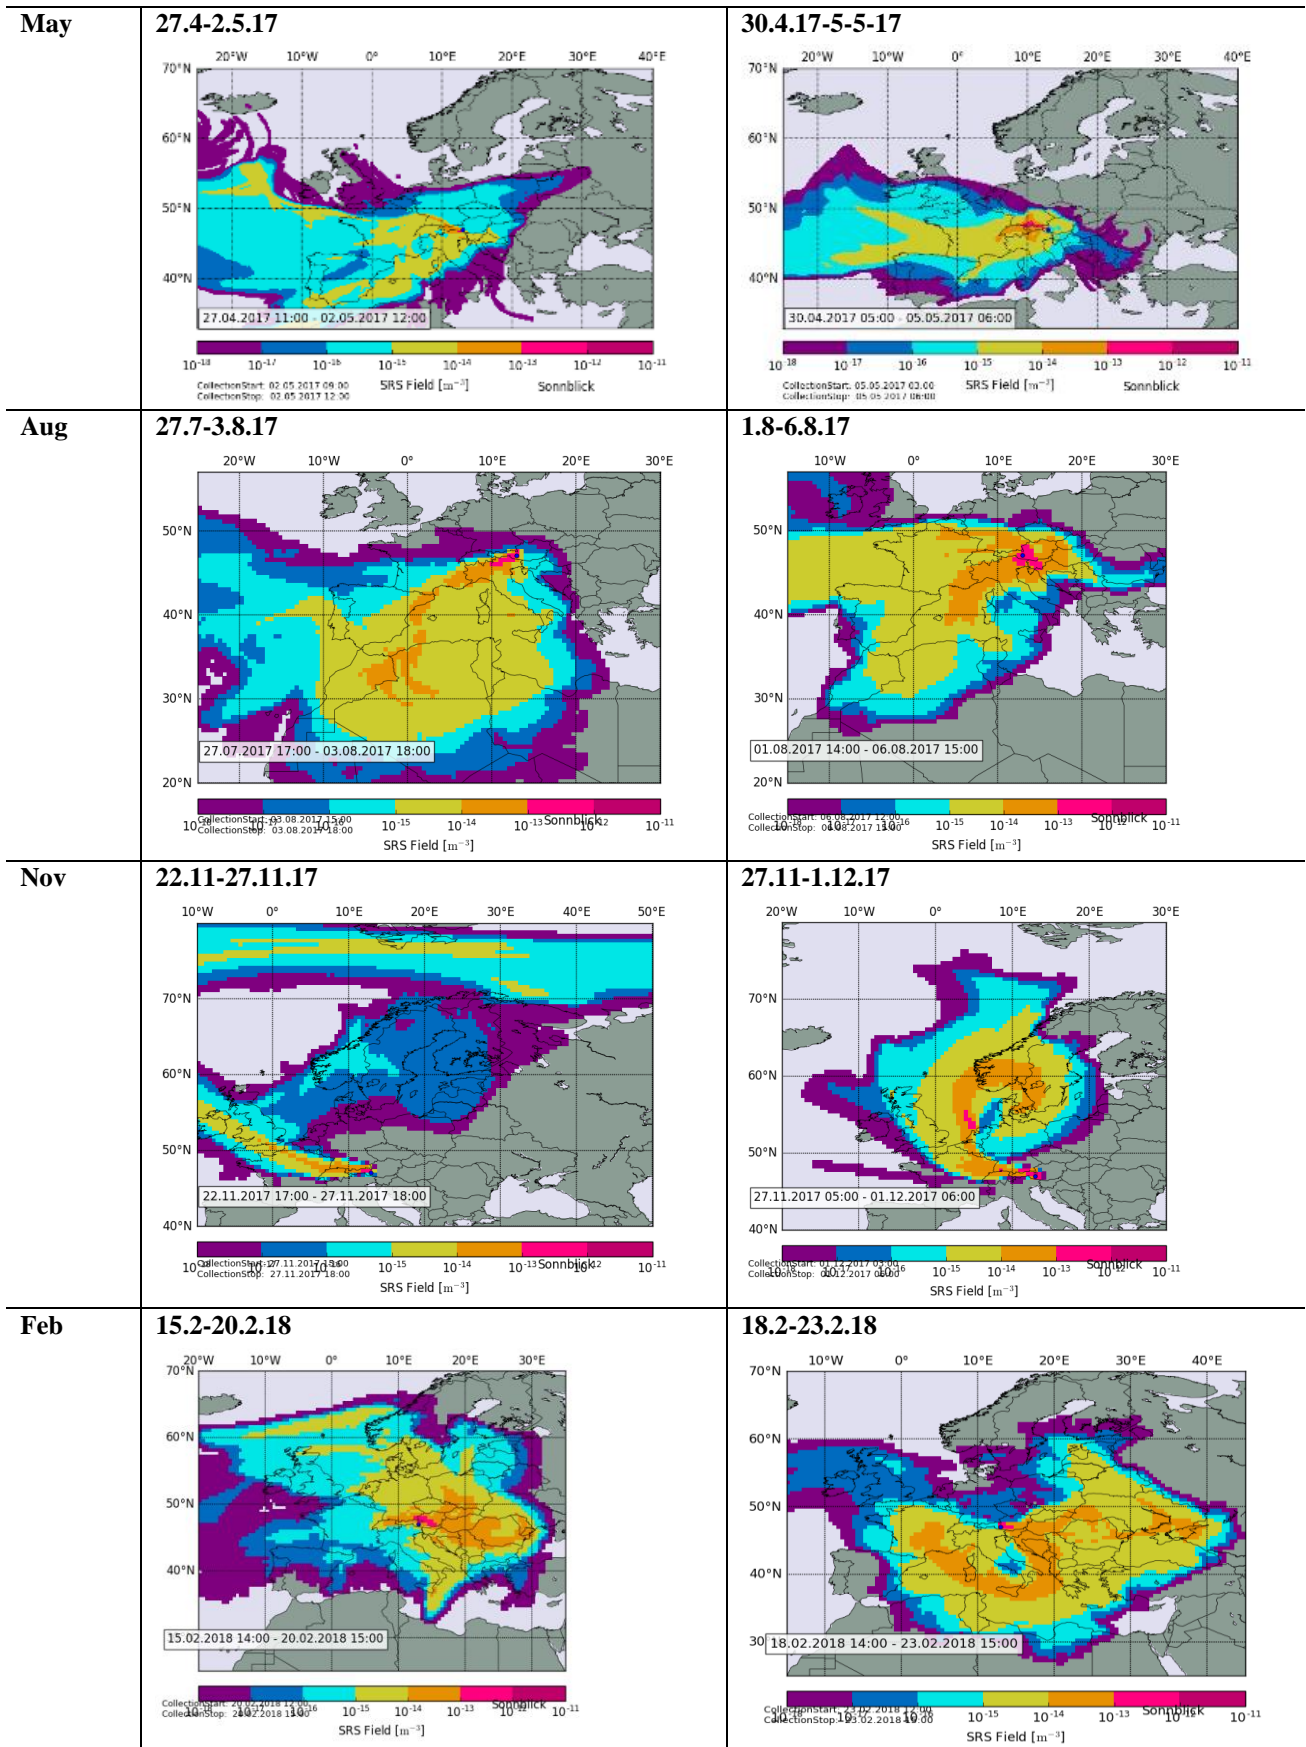

Figure S6 FLEXPART 120hrs air-mass backcalculation for the location Sonnblick Observatory to identify possible source regions of air masses, calculations were done for the first and last day of the sampling periods respectively

Table S11 Mean relative abundances (%) of the ten most abundant bacterial phyla, resp. fungal classes, \*in August the abundances of rain and hail in ( ) are given

| Bacteria                          |              |       |             |      |      | Fungi                   |              |      |           |      |      |
|-----------------------------------|--------------|-------|-------------|------|------|-------------------------|--------------|------|-----------|------|------|
| Phylum                            | Sample Type  | May   | Aug         | Nov  | Feb  | Class                   | Sample Type  | May  | Aug       | Nov  | Feb  |
| <i>Acido-bacteria</i>             | Air          | 10.8  | 6.9         | 0.2  | 1.8  | <i>Agarico-mycetes</i>  | Air          | 38.3 | 54.9      | 9.9  | 34.6 |
|                                   | Snow         | 2.9   | 1.8         | 6.2  | 3.2  |                         | Snow         | 30.6 | 4.01      | 27.4 | 2.7  |
|                                   | Cloud*(R)(H) | 12.5  | 7.3(0.3)    | 4.6  | 4.2  |                         | Cloud*(R)(H) | 7.7  | 55.5(3.3) | 26.2 | 2.9  |
| <i>Actino-bacteria</i>            | Air          | 8.6   | 7.5         | 6.4  | 14.9 | <i>Dothideo-mycetes</i> | Air          | 0.9  | 2.9       | 3.3  | 4.6  |
|                                   | Snow         | 53.8  | 20.1        | 18.6 | 28.1 |                         | Snow         | 1.9  | 2.1       | 9.9  | 21.9 |
|                                   | Cloud*(R)(H) | 10.9  | 36.4(5.3)   | 34.8 | 40.7 |                         | Cloud*(R)(H) | 9.8  | 0.4(36.5) | 12.3 | 35.8 |
| <i>Bacterio-detes</i>             | Air          | 11.8  | 11.8        | 0.4  | 3.3  | <i>Eurotio-mycetes</i>  | Air          | 22.2 | 0.9       | 14.1 | 4.3  |
|                                   | Snow         | 1.3   | 47.4        | 22.0 | 17.5 |                         | Snow         | 0.1  | 0.1       | 15.8 | 20.2 |
|                                   | Cloud*(R)(H) | 2.0   | 4.0(4.7)    | 10.5 | 5.5  |                         | Cloud*(R)(H) | 2.1  | 0.1(2.5)  | 23.9 | 18.1 |
| <i>Chloroflexi</i>                | Air          | 2.6   | 0.2         | 0.9  | 0.1  | <i>Lecarno-mycetes</i>  | Air          | 0.0  | 18.9      | 0.0  | 1.3  |
|                                   | Snow         | 3.3   | 0.01        | 4.2  | 1.3  |                         | Snow         | 0.5  | 7.6       | 16.8 | 26.5 |
|                                   | Cloud*(R)(H) | 0.1   | 0.0(0.0)    | 4.5  | 2.3  |                         | Cloud*(R)(H) | 3.2  | 0.1(1.2)  | 9.2  | 10.3 |
| <i>Cyano-Bacteria/Chloroplast</i> | Air          | 0.9   | 3.6         | 0.1  | 3.3  | <i>Leotio-mycetes</i>   | Air          | 0.0  | 7.8       | 1.3  | 0.5  |
|                                   | Snow         | 7.8   | 2.7         | 13.4 | 16.7 |                         | Snow         | 0.6  | 11.7      | 12.4 | 6.2  |
|                                   | Cloud*(R)(H) | 8.6   | 0.0(0.8)    | 12.5 | 20.8 |                         | Cloud*(R)(H) | 6.0  | 0.1(31.6) | 9.8  | 2.9  |
| <i>Deinococcus-Thermus</i>        | Air          | 0.1   | 1.0         | 0.1  | 1.3  | <i>Saccharo-mycetes</i> | Air          | 10.4 | 0.1       | 0.4  | 6.9  |
|                                   | Snow         | 0.2   | 0.1         | 0.5  | 0.5  |                         | Snow         | 0.0  | 0.1       | 0.0  | 0.0  |
|                                   | Cloud*(R)(H) | 0.1   | 0.0(0.0)    | 0.4  | 0.8  |                         | Cloud*(R)(H) | 0.0  | 0.0(0.0)  | 0.1  | 0.3  |
| <i>Firmicutes</i>                 | Air          | 5.1   | 14.8        | 78.4 | 48.1 | <i>Sordario-mycetes</i> | Air          | 0.0  | 1.9       | 23.2 | 0.0  |
|                                   | Snow         | 19.0  | 0.0         | 3.2  | 2.9  |                         | Snow         | 1.8  | 13.9      | 1.8  | 4.5  |
|                                   | Cloud*(R)(H) | 11.4  | 3.8(0.0)    | 7.3  | 3.1  |                         | Cloud*(R)(H) | 2.9  | 37.2(0.7) | 1.8  | 1.5  |
| <i>Nitrospirae</i>                | Air          | 0.6   | 0.0         | 0.4  | 0.2  | <i>Tremello-mycetes</i> | Air          | 10.2 | 0.9       | 12.1 | 1.6  |
|                                   | Snow         | 0.0   | 0.0         | 1.3  | 0.2  |                         | Snow         | 0.1  | 2.05      | 1.9  | 3.3  |
|                                   | Cloud*(R)(H) | 0.6   | 0.0(0.0)    | 0.8  | 0.5  |                         | Cloud*(R)(H) | 36.4 | 0.00(7.8) | 1.8  | 1.5  |
| <i>Plancto-mycetes</i>            | Air          | 5.2   | 4.8         | 1.8  | 3.7  | <i>unidentified</i>     | Air          | 6.9  | 11.6      | 35.5 | 39.9 |
|                                   | Snow         | 1.4   | 0.6         | 6.3  | 2.5  |                         | Snow         | 64.5 | 58.5      | 11.5 | 14.6 |
|                                   | Cloud*(R)(H) | 2.8   | 12.32(0.01) | 4.9  | 3.9  |                         | Cloud*(R)(H) | 31.8 | 6.7(16.4) | 9.4  | 26.8 |
| <i>Proteo-bacteria</i>            | Air          | 54.3  | 49.4        | 11.2 | 23.2 | <i>Wallemio-mycetes</i> | Air          | 11.1 | 0.0       | 0.2  | 6.2  |
|                                   | Snow         | 10.32 | 27.1        | 24.4 | 27.2 |                         | Snow         | 0.0  | 0.0       | 2.4  | 0.0  |
|                                   | Cloud*(R)(H) | 51.1  | 36.2(88.8)  | 19.6 | 18.2 |                         | Cloud*(R)(H) | 0.1  | 0.0(0.0)  | 5.5  | 0.1  |

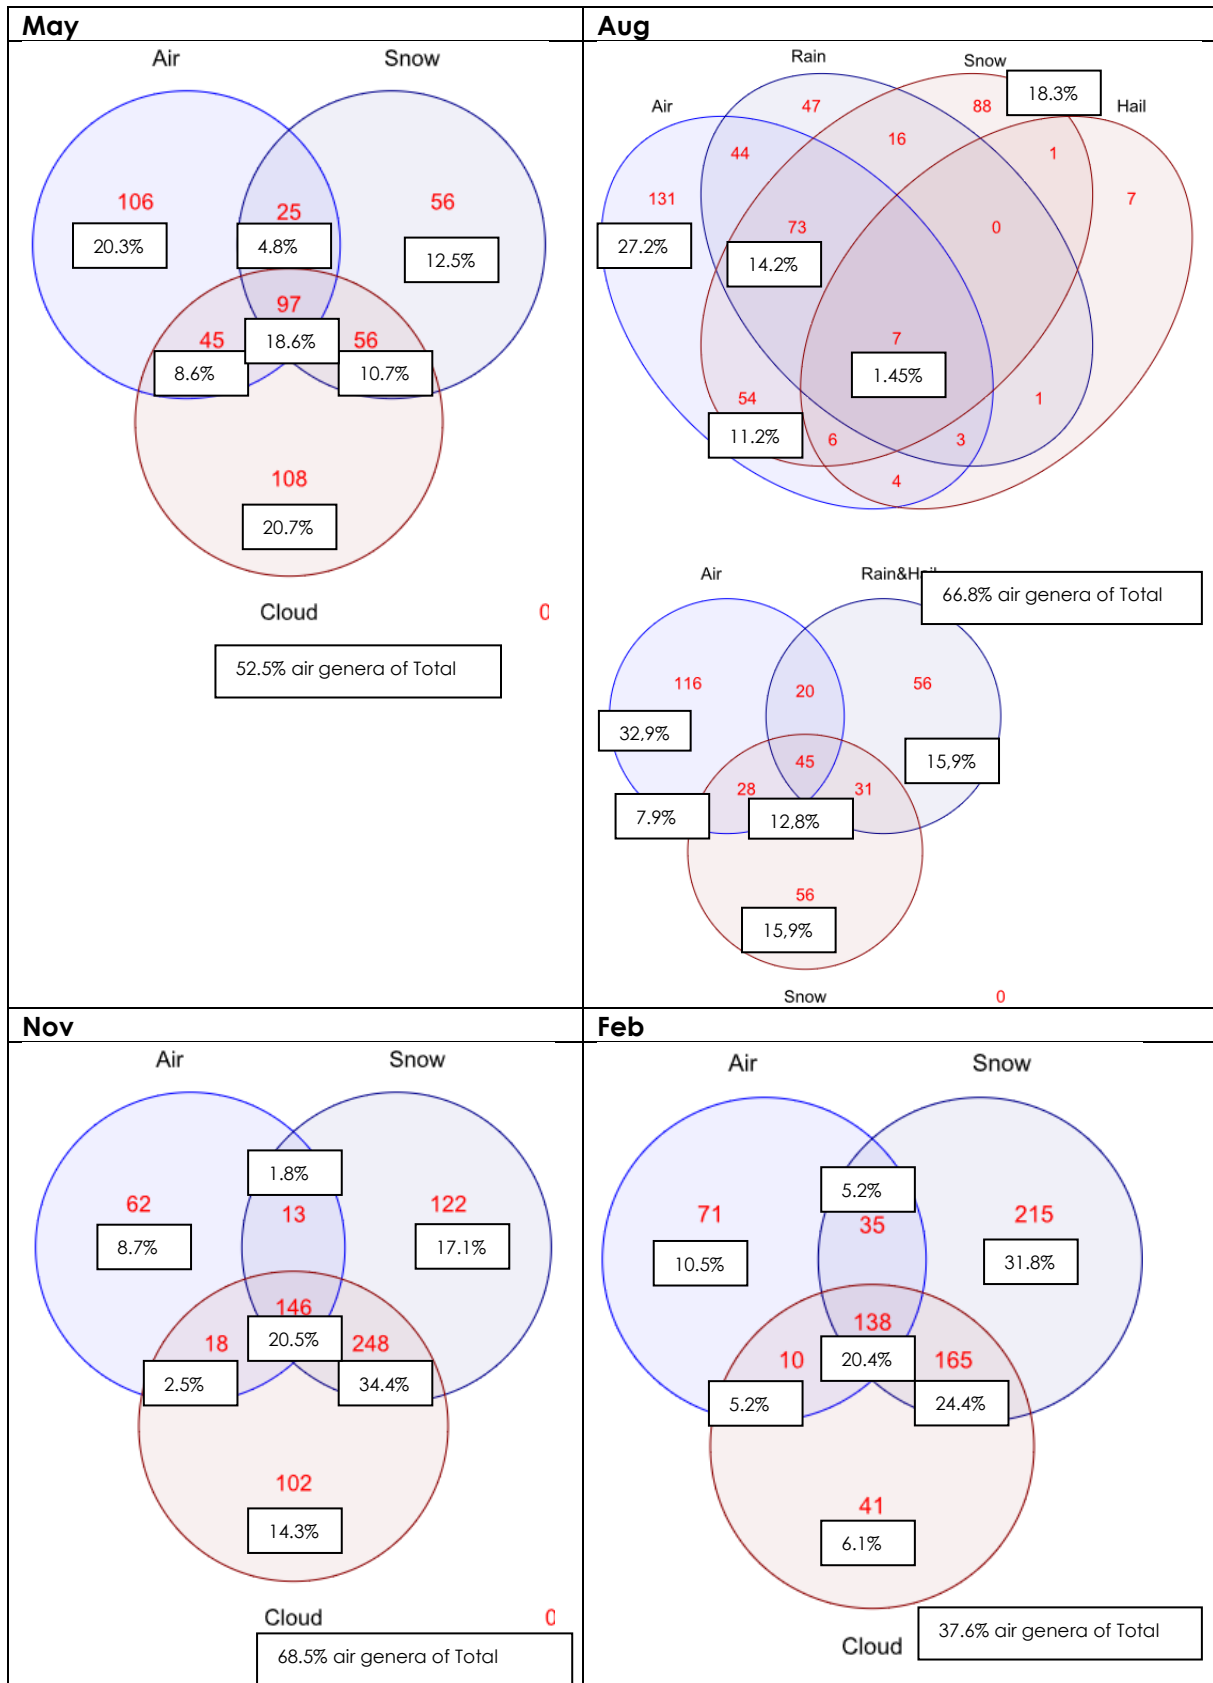

Figure S7 Venn-diagrams of unique and shared bacterial genera for air and precipitation by season, red numbers indicate the number of genera, %ages are given as share of the total genera per season

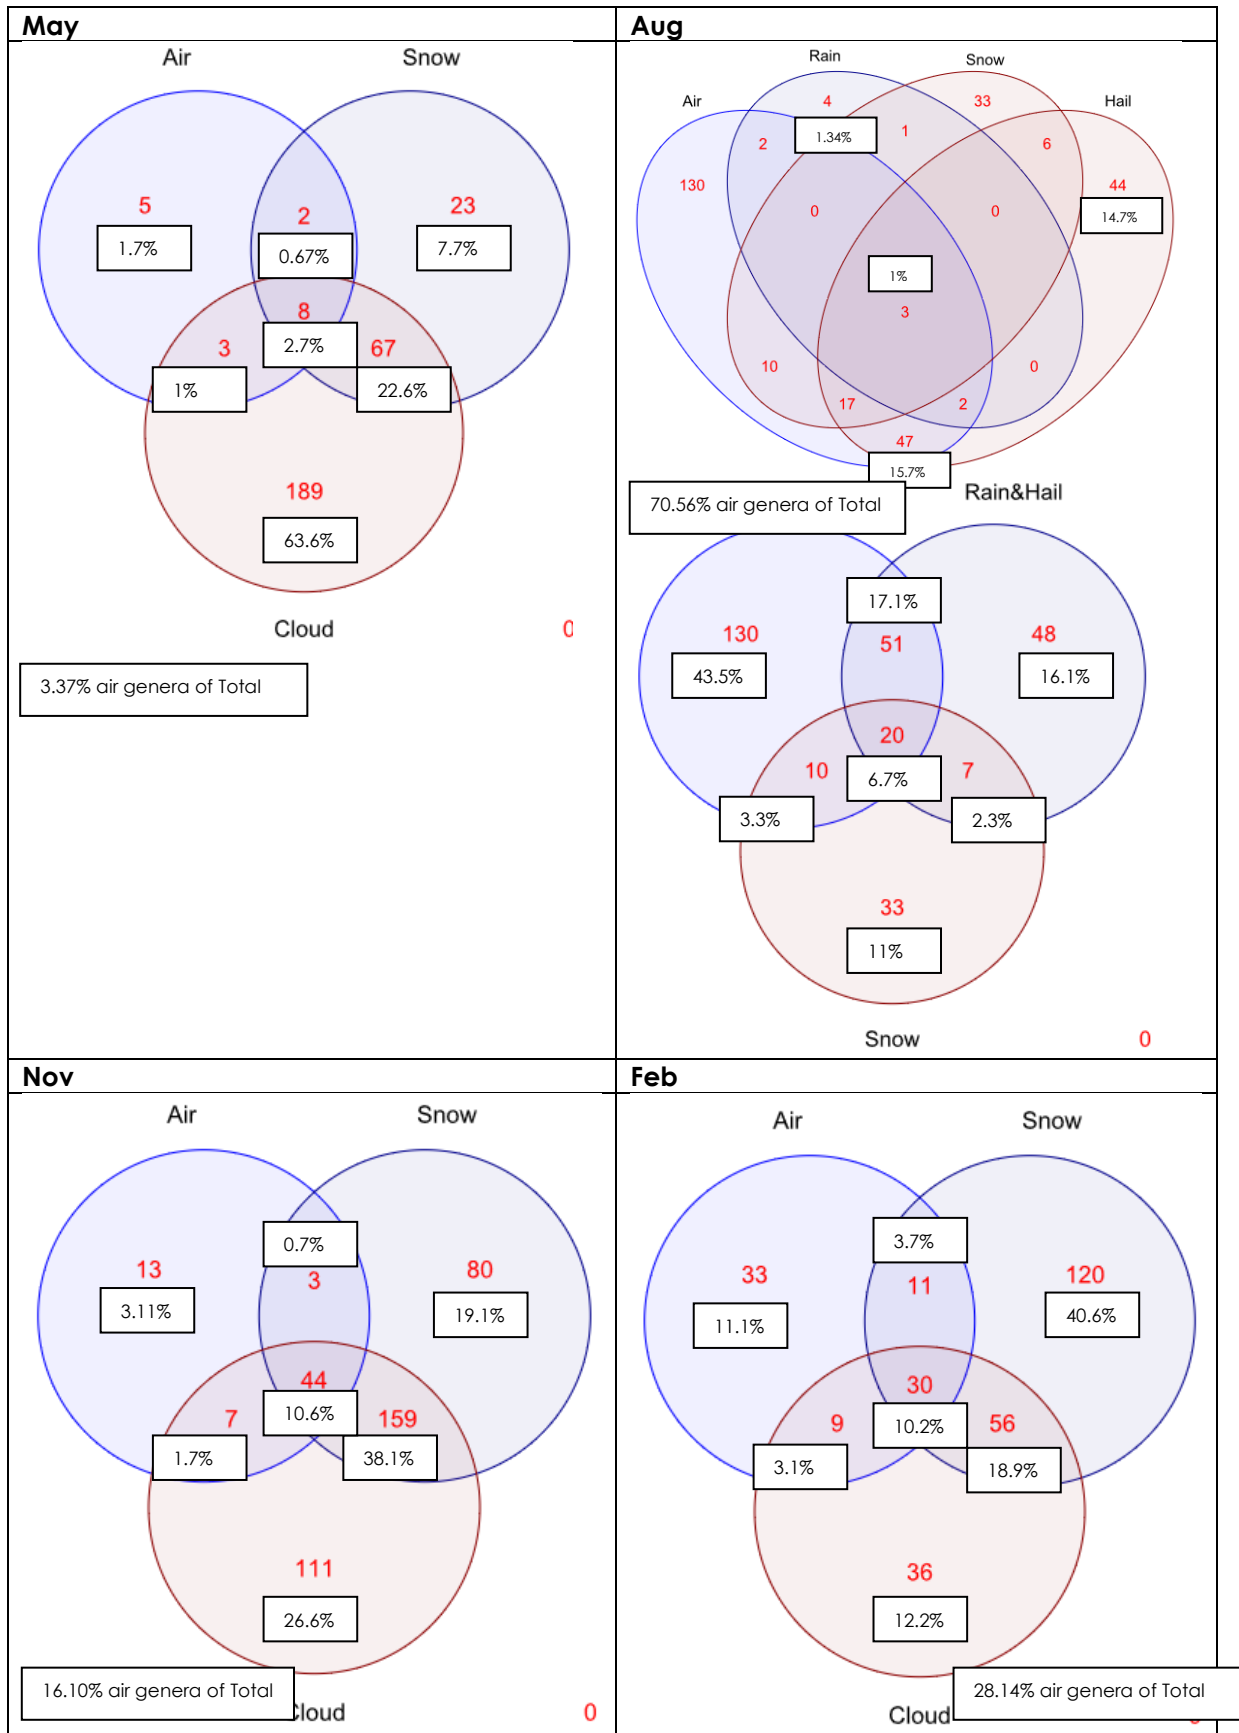

Figure S8 Venn-diagrams of unique and shared fungal genera for air and precipitation by season, red numbers indicate the number of genera, %ages are given as share of the total genera per season

*Table S12 SIMPER analysis of the bacterial genera driving difference in Bray-Curtis distance in seasonal air*

| <b>d_Feb_a_May</b>         | <b>average</b> | <b>sd</b> | <b>ratio</b> | <b>ava</b> | <b>avb</b> | <b>cumsum</b> |
|----------------------------|----------------|-----------|--------------|------------|------------|---------------|
| Geobacillus                | 0.11           | 0.14      | 0.78         | 21.21      | 2.70       | 0.12          |
| Aminobacter                | 0.08           | 0.05      | 1.40         | 3.25       | 16.52      | 0.20          |
| Chlorophyta                | 0.03           | 0.07      | 0.48         | 6.24       | 1.33       | 0.23          |
| Bosea                      | 0.03           | 0.04      | 0.92         | 0.00       | 6.60       | 0.27          |
| Schlesneria                | 0.03           | 0.03      | 1.18         | 0.74       | 6.40       | 0.30          |
| Roseomonas                 | 0.03           | 0.09      | 0.31         | 5.63       | 0.09       | 0.33          |
| Providencia                | 0.02           | 0.08      | 0.30         | 4.99       | 0.01       | 0.36          |
| Tepidimonas                | 0.02           | 0.03      | 0.87         | 0.00       | 4.45       | 0.38          |
| Rothia                     | 0.02           | 0.03      | 0.66         | 4.01       | 0.27       | 0.41          |
| Rhodopseudomonas           | 0.02           | 0.04      | 0.54         | 0.56       | 3.80       | 0.43          |
| <b>d_Feb_b_Aug</b>         | <b>average</b> | <b>sd</b> | <b>ratio</b> | <b>ava</b> | <b>avb</b> | <b>cumsum</b> |
| Geobacillus                | 0.11           | 0.15      | 0.73         | 21.21      | 0.04       | 0.11          |
| Bosea                      | 0.04           | 0.03      | 1.31         | 0.00       | 7.92       | 0.15          |
| Burkholderia               | 0.03           | 0.07      | 0.51         | 0.97       | 6.50       | 0.19          |
| Chlorophyta                | 0.03           | 0.07      | 0.44         | 6.24       | 0.69       | 0.22          |
| Aminobacter                | 0.03           | 0.03      | 0.85         | 3.25       | 4.33       | 0.25          |
| Roseomonas                 | 0.03           | 0.09      | 0.31         | 5.63       | 0.00       | 0.28          |
| Schlesneria                | 0.03           | 0.02      | 1.05         | 0.74       | 5.24       | 0.31          |
| Providencia                | 0.02           | 0.08      | 0.30         | 4.99       | 0.00       | 0.33          |
| Cloacibacterium            | 0.02           | 0.05      | 0.50         | 0.34       | 4.42       | 0.36          |
| Rothia                     | 0.02           | 0.03      | 0.68         | 4.01       | 0.46       | 0.38          |
| <b>d_Feb_c_Nov</b>         | <b>average</b> | <b>sd</b> | <b>ratio</b> | <b>ava</b> | <b>avb</b> | <b>cumsum</b> |
| Geobacillus                | 0.16           | 0.15      | 1.09         | 21.21      | 29.91      | 0.19          |
| Tumebacillus               | 0.04           | 0.06      | 0.69         | 0.00       | 7.92       | 0.23          |
| Microbacterium             | 0.04           | 0.07      | 0.59         | 0.31       | 7.98       | 0.28          |
| Chlorophyta                | 0.03           | 0.07      | 0.46         | 6.24       | 0.87       | 0.32          |
| Roseomonas                 | 0.03           | 0.09      | 0.35         | 5.63       | 0.79       | 0.35          |
| Providencia                | 0.02           | 0.08      | 0.30         | 4.99       | 0.00       | 0.38          |
| Aminobacter                | 0.02           | 0.03      | 0.74         | 3.25       | 2.83       | 0.41          |
| unclass_Enterobacteriaceae | 0.02           | 0.03      | 0.79         | 0.22       | 4.62       | 0.43          |
| Rothia                     | 0.02           | 0.03      | 0.68         | 4.01       | 0.49       | 0.46          |
| Herbaspirillum             | 0.02           | 0.05      | 0.34         | 0.00       | 3.70       | 0.48          |
| <b>a_May_b_Aug</b>         | <b>average</b> | <b>sd</b> | <b>ratio</b> | <b>ava</b> | <b>avb</b> | <b>cumsum</b> |
| Aminobacter                | 0.07           | 0.05      | 1.40         | 16.52      | 4.33       | 0.09          |
| Bosea                      | 0.04           | 0.03      | 1.28         | 6.60       | 7.92       | 0.13          |
| Burkholderia               | 0.04           | 0.07      | 0.54         | 1.60       | 6.50       | 0.17          |
| Schlesneria                | 0.03           | 0.02      | 1.15         | 6.40       | 5.24       | 0.21          |
| Rhodopseudomonas           | 0.03           | 0.05      | 0.60         | 3.80       | 2.44       | 0.24          |
| Cloacibacterium            | 0.02           | 0.05      | 0.53         | 0.62       | 4.42       | 0.27          |
| Tepidimonas                | 0.02           | 0.02      | 0.96         | 4.45       | 2.48       | 0.29          |
| Duganella                  | 0.02           | 0.05      | 0.37         | 3.60       | 0.43       | 0.32          |
| Gp1                        | 0.02           | 0.02      | 1.07         | 2.52       | 2.74       | 0.34          |
| Geodermatophilus           | 0.02           | 0.03      | 0.53         | 0.00       | 3.11       | 0.35          |
| <b>a_May_c_Nov</b>         | <b>average</b> | <b>sd</b> | <b>ratio</b> | <b>ava</b> | <b>avb</b> | <b>cumsum</b> |
| Geobacillus                | 0.15           | 0.16      | 0.90         | 2.70       | 29.91      | 0.16          |
| Aminobacter                | 0.08           | 0.05      | 1.39         | 16.52      | 2.83       | 0.25          |
| Tumebacillus               | 0.04           | 0.06      | 0.69         | 0.00       | 7.92       | 0.29          |
| Microbacterium             | 0.04           | 0.07      | 0.60         | 0.46       | 7.98       | 0.33          |
| Bosea                      | 0.03           | 0.03      | 0.97         | 6.60       | 1.95       | 0.37          |
| Schlesneria                | 0.03           | 0.02      | 1.20         | 6.40       | 2.79       | 0.40          |
| unclass_Enterobacteriaceae | 0.02           | 0.03      | 0.80         | 0.33       | 4.62       | 0.43          |
| Tepidimonas                | 0.02           | 0.02      | 0.91         | 4.45       | 1.19       | 0.45          |
| Rhodopseudomonas           | 0.02           | 0.04      | 0.54         | 3.80       | 0.56       | 0.47          |
| Herbaspirillum             | 0.02           | 0.05      | 0.34         | 0.01       | 3.70       | 0.49          |
| <b>b_Aug_c_Nov</b>         | <b>average</b> | <b>sd</b> | <b>ratio</b> | <b>ava</b> | <b>avb</b> | <b>cumsum</b> |
| Geobacillus                | 0.15           | 0.17      | 0.90         | 0.04       | 29.91      | 0.16          |
| Tumebacillus               | 0.04           | 0.06      | 0.69         | 0.34       | 7.92       | 0.20          |
| Microbacterium             | 0.04           | 0.07      | 0.59         | 0.38       | 7.98       | 0.25          |
| Burkholderia               | 0.03           | 0.07      | 0.51         | 6.50       | 1.02       | 0.28          |
| Bosea                      | 0.03           | 0.03      | 1.19         | 7.92       | 1.95       | 0.32          |



|                            |      |      |      |      |      |      |
|----------------------------|------|------|------|------|------|------|
| Aminobacter                | 0.03 | 0.03 | 0.94 | 4.33 | 2.83 | 0.35 |
| Schlesneria                | 0.02 | 0.02 | 1.09 | 5.24 | 2.79 | 0.37 |
| unclass_Enterobacteriaceae | 0.02 | 0.03 | 0.85 | 0.91 | 4.62 | 0.40 |
| Cloacibacterium            | 0.02 | 0.05 | 0.46 | 4.42 | 0.00 | 0.42 |
| Herbaspirillum             | 0.02 | 0.05 | 0.34 | 0.00 | 3.70 | 0.44 |

*Table S13 SIMPER analysis of the bacterial phyla driving difference in Bray-Curtis distance in seasonal air*

| <b>d_Feb_a_May</b>        | <b>average</b> | <b>sd</b> | <b>ratio</b> | <b>ava</b> | <b>avb</b> | <b>cumsum</b> |
|---------------------------|----------------|-----------|--------------|------------|------------|---------------|
| Proteobacteria            | 0.17           | 0.09      | 1.89         | 28.91      | 54.96      | 0.30          |
| Firmicutes                | 0.13           | 0.12      | 1.03         | 27.63      | 7.18       | 0.52          |
| Actinobacteria            | 0.06           | 0.08      | 0.75         | 15.00      | 7.34       | 0.63          |
| Planctomycetes            | 0.04           | 0.04      | 1.10         | 6.85       | 7.93       | 0.70          |
| Acidobacteria             | 0.04           | 0.03      | 1.13         | 3.23       | 7.36       | 0.77          |
| Cyanobacteria/Chloroplast | 0.04           | 0.07      | 0.49         | 6.46       | 1.33       | 0.83          |
| <b>d_Feb_b_Aug</b>        | <b>average</b> | <b>sd</b> | <b>ratio</b> | <b>ava</b> | <b>avb</b> | <b>cumsum</b> |
| Proteobacteria            | 0.13           | 0.08      | 1.72         | 28.91      | 43.23      | 0.25          |
| Firmicutes                | 0.12           | 0.11      | 1.14         | 27.63      | 15.10      | 0.48          |
| Actinobacteria            | 0.07           | 0.08      | 0.81         | 15.00      | 8.97       | 0.60          |
| Bacteroidetes             | 0.05           | 0.04      | 1.15         | 5.21       | 11.01      | 0.69          |
| Verrucomicrobia           | 0.04           | 0.06      | 0.69         | 5.71       | 4.02       | 0.76          |
| Planctomycetes            | 0.04           | 0.04      | 0.94         | 6.85       | 6.00       | 0.83          |
| <b>d_Feb_c_Nov</b>        | <b>average</b> | <b>sd</b> | <b>ratio</b> | <b>ava</b> | <b>avb</b> | <b>cumsum</b> |
| Firmicutes                | 0.17           | 0.13      | 1.36         | 27.63      | 43.99      | 0.31          |
| Proteobacteria            | 0.12           | 0.09      | 1.32         | 28.91      | 29.56      | 0.53          |
| Actinobacteria            | 0.08           | 0.08      | 0.96         | 15.00      | 13.02      | 0.68          |
| Planctomycetes            | 0.04           | 0.04      | 0.84         | 6.85       | 4.16       | 0.75          |
| Cyanobacteria/Chloroplast | 0.03           | 0.07      | 0.47         | 6.46       | 0.88       | 0.81          |
| Verrucomicrobia           | 0.03           | 0.06      | 0.56         | 5.71       | 1.94       | 0.87          |
| <b>a_May_b_Aug</b>        | <b>average</b> | <b>sd</b> | <b>ratio</b> | <b>ava</b> | <b>avb</b> | <b>cumsum</b> |
| Proteobacteria            | 0.09           | 0.07      | 1.31         | 54.96      | 43.23      | 0.23          |
| Firmicutes                | 0.07           | 0.06      | 1.09         | 7.18       | 15.10      | 0.40          |
| Bacteroidetes             | 0.05           | 0.05      | 1.14         | 6.06       | 11.01      | 0.53          |
| Acidobacteria             | 0.04           | 0.04      | 1.07         | 7.36       | 6.99       | 0.64          |
| Actinobacteria            | 0.04           | 0.04      | 0.98         | 7.34       | 8.97       | 0.73          |
| Planctomycetes            | 0.03           | 0.02      | 1.30         | 7.93       | 6.00       | 0.81          |
| <b>a_May_c_Nov</b>        | <b>average</b> | <b>sd</b> | <b>ratio</b> | <b>ava</b> | <b>avb</b> | <b>cumsum</b> |
| Firmicutes                | 0.19           | 0.14      | 1.30         | 7.18       | 43.99      | 0.33          |
| Proteobacteria            | 0.14           | 0.09      | 1.57         | 54.96      | 29.56      | 0.59          |
| Actinobacteria            | 0.06           | 0.06      | 1.02         | 7.34       | 13.02      | 0.70          |
| Acidobacteria             | 0.04           | 0.04      | 1.02         | 7.36       | 0.52       | 0.76          |
| Planctomycetes            | 0.03           | 0.02      | 1.37         | 7.93       | 4.16       | 0.82          |
| Bacteroidetes             | 0.03           | 0.04      | 0.75         | 6.06       | 0.82       | 0.87          |
| <b>b_Aug_c_Nov</b>        | <b>average</b> | <b>sd</b> | <b>ratio</b> | <b>ava</b> | <b>avb</b> | <b>cumsum</b> |
| Firmicutes                | 0.16           | 0.14      | 1.22         | 15.10      | 43.99      | 0.32          |
| Proteobacteria            | 0.10           | 0.07      | 1.41         | 43.23      | 29.56      | 0.52          |
| Actinobacteria            | 0.06           | 0.06      | 1.04         | 8.97       | 13.02      | 0.64          |
| Bacteroidetes             | 0.05           | 0.05      | 1.06         | 11.01      | 0.82       | 0.74          |
| Acidobacteria             | 0.03           | 0.04      | 0.76         | 6.99       | 0.52       | 0.81          |
| Planctomycetes            | 0.03           | 0.02      | 1.16         | 6.00       | 4.16       | 0.86          |

Table S141 SIMPER analysis of the bacterial genera driving difference in Bray-Curtis distance in air and precipitation

| <b>Air_seasons_Snow [%]</b>          | <b>average</b> | <b>sd</b> | <b>ratio</b> | <b>ava</b> | <b>avb</b> | <b>cumsum</b> |
|--------------------------------------|----------------|-----------|--------------|------------|------------|---------------|
| Geobacillus                          | 0.07           | 0.13      | 0.53         | 13.52      | 0.02       | 0.07          |
| Aminobacter                          | 0.03           | 0.05      | 0.72         | 6.99       | 0.04       | 0.11          |
| Chlorophyta                          | 0.03           | 0.04      | 0.89         | 2.30       | 5.89       | 0.14          |
| Nakamurella                          | 0.03           | 0.02      | 1.11         | 0.45       | 5.52       | 0.17          |
| Ferruginibacter                      | 0.03           | 0.05      | 0.49         | 0.29       | 5.26       | 0.20          |
| Roseomonas                           | 0.02           | 0.05      | 0.51         | 1.63       | 3.59       | 0.23          |
| Bosea                                | 0.02           | 0.03      | 0.72         | 4.09       | 0.36       | 0.25          |
| Bacillariophyta                      | 0.02           | 0.03      | 0.68         | 0.14       | 3.92       | 0.27          |
| Schlesneria                          | 0.02           | 0.02      | 0.80         | 3.81       | 0.06       | 0.29          |
| Flavobacterium                       | 0.02           | 0.02      | 0.97         | 0.42       | 3.44       | 0.31          |
| Burkholderia                         | 0.01           | 0.04      | 0.33         | 2.42       | 0.15       | 0.32          |
| Spartobacteria_genera_incertae_sedis | 0.01           | 0.01      | 0.84         | 0.96       | 2.10       | 0.33          |
| Microbacterium                       | 0.01           | 0.04      | 0.31         | 2.29       | 0.22       | 0.35          |
| Mucilaginibacter                     | 0.01           | 0.03      | 0.37         | 0.41       | 1.78       | 0.36          |
| Tepidimonas                          | 0.01           | 0.02      | 0.60         | 2.07       | 0.01       | 0.37          |
| Tumebacillus                         | 0.01           | 0.03      | 0.31         | 2.06       | 0.00       | 0.38          |
| unclass_Planctomycetaceae            | 0.01           | 0.02      | 0.56         | 1.40       | 1.30       | 0.39          |
| Rhodopseudomonas                     | 0.01           | 0.03      | 0.37         | 1.87       | 0.27       | 0.40          |
| Gp1                                  | 0.01           | 0.02      | 0.59         | 1.81       | 0.31       | 0.41          |
| Rhodopila                            | 0.01           | 0.01      | 0.68         | 0.35       | 1.57       | 0.42          |
| Janibacter                           | 0.01           | 0.03      | 0.30         | 0.16       | 1.66       | 0.43          |
| Janthinobacterium                    | 0.01           | 0.01      | 0.60         | 0.67       | 1.41       | 0.44          |
| Duganella                            | 0.01           | 0.03      | 0.30         | 1.08       | 0.73       | 0.45          |
| Cryobacterium                        | 0.01           | 0.01      | 0.66         | 0.05       | 1.69       | 0.46          |
| GpXIII                               | 0.01           | 0.01      | 0.65         | 0.18       | 1.47       | 0.47          |
| Pseudonocardia                       | 0.01           | 0.01      | 0.82         | 0.26       | 1.47       | 0.47          |
| unclass_Enterobacteriaceae           | 0.01           | 0.02      | 0.42         | 1.51       | 0.06       | 0.48          |
| Gp16                                 | 0.01           | 0.01      | 0.75         | 0.41       | 1.18       | 0.49          |
| Rothia                               | 0.01           | 0.02      | 0.37         | 1.30       | 0.07       | 0.50          |
| <b>Air-Seasons_Cloud [%]</b>         | <b>average</b> | <b>sd</b> | <b>ratio</b> | <b>ava</b> | <b>avb</b> | <b>cumsum</b> |
| Geobacillus                          | 0.07           | 0.13      | 0.53         | 13.52      | 0.17       | 0.07          |
| Bosea                                | 0.04           | 0.07      | 0.61         | 4.09       | 5.77       | 0.12          |
| Janthinobacterium                    | 0.04           | 0.10      | 0.39         | 0.67       | 7.57       | 0.16          |
| Chlorophyta                          | 0.04           | 0.04      | 0.91         | 2.30       | 7.35       | 0.20          |
| Aminobacter                          | 0.04           | 0.05      | 0.78         | 6.99       | 1.19       | 0.24          |
| Burkholderia                         | 0.02           | 0.05      | 0.49         | 2.42       | 2.76       | 0.27          |
| Schlesneria                          | 0.02           | 0.02      | 0.82         | 3.81       | 0.31       | 0.29          |
| Nakamurella                          | 0.01           | 0.02      | 0.66         | 0.45       | 2.73       | 0.30          |
| Roseomonas                           | 0.01           | 0.05      | 0.31         | 1.63       | 1.55       | 0.32          |
| Bacillariophyta                      | 0.01           | 0.02      | 0.55         | 0.14       | 2.66       | 0.33          |
| Alteromonas                          | 0.01           | 0.03      | 0.37         | 0.19       | 2.42       | 0.35          |
| Cloacibacterium                      | 0.01           | 0.03      | 0.42         | 1.27       | 1.30       | 0.36          |
| Romboutsia                           | 0.01           | 0.02      | 0.78         | 0.41       | 2.12       | 0.37          |
| Microbacterium                       | 0.01           | 0.04      | 0.30         | 2.29       | 0.04       | 0.39          |
| Rhodopseudomonas                     | 0.01           | 0.03      | 0.40         | 1.87       | 0.53       | 0.40          |
| Sanguibacter                         | 0.01           | 0.02      | 0.47         | 0.00       | 2.12       | 0.41          |
| Tumebacillus                         | 0.01           | 0.03      | 0.32         | 2.06       | 0.09       | 0.42          |
| unclass_Planctomycetaceae            | 0.01           | 0.02      | 0.59         | 1.40       | 1.40       | 0.43          |
| Tepidimonas                          | 0.01           | 0.02      | 0.60         | 2.07       | 0.00       | 0.44          |
| Granulicella                         | 0.01           | 0.01      | 0.78         | 0.31       | 1.93       | 0.45          |
| Spartobacteria_genera_incertae_sedis | 0.01           | 0.01      | 0.92         | 0.96       | 1.45       | 0.46          |
| Gp1                                  | 0.01           | 0.02      | 0.57         | 1.81       | 0.16       | 0.47          |
| Terriglobus                          | 0.01           | 0.02      | 0.56         | 0.30       | 1.58       | 0.48          |
| Rhodopila                            | 0.01           | 0.01      | 0.66         | 0.35       | 1.27       | 0.49          |
| unclass_Enterobacteriaceae           | 0.01           | 0.02      | 0.42         | 1.51       | 0.05       | 0.50          |
| <b>Air_Seasons_Hail [%]</b>          | <b>average</b> | <b>sd</b> | <b>ratio</b> | <b>ava</b> | <b>avb</b> | <b>cumsum</b> |
| Janthinobacterium                    | 0.41           | 0.01      | 43.99        | 0.67       | 82.86      | 0.42          |
| Geobacillus                          | 0.07           | 0.13      | 0.53         | 13.52      | 0.00       | 0.49          |
| Aminobacter                          | 0.03           | 0.05      | 0.71         | 6.99       | 0.00       | 0.52          |
| Bosea                                | 0.02           | 0.03      | 0.69         | 4.09       | 0.05       | 0.55          |
| Schlesneria                          | 0.02           | 0.02      | 0.79         | 3.81       | 0.00       | 0.57          |

|                             |                |           |              |            |            |               |
|-----------------------------|----------------|-----------|--------------|------------|------------|---------------|
| Chlorophyta                 | 0.01           | 0.04      | 0.32         | 2.30       | 0.54       | 0.58          |
| Burkholderia                | 0.01           | 0.04      | 0.32         | 2.42       | 0.00       | 0.59          |
| Microbacterium              | 0.01           | 0.04      | 0.30         | 2.29       | 0.00       | 0.60          |
| unclass_Cytophagales        | 0.01           | 0.00      | 5.92         | 0.16       | 2.38       | 0.61          |
| Subtercola                  | 0.01           | 0.00      | 16.93        | 0.03       | 2.11       | 0.62          |
| <b>Air_Seasons_Rain [%]</b> | <b>average</b> | <b>sd</b> | <b>ratio</b> | <b>ava</b> | <b>avb</b> | <b>cumsum</b> |
| Gp1                         | 0.11           | 0.11      | 1.07         | 1.81       | 22.73      | 0.12          |
| Dehalospirillum             | 0.11           | 0.11      | 0.99         | 0.00       | 21.90      | 0.23          |
| Geobacillus                 | 0.07           | 0.13      | 0.53         | 13.52      | 0.16       | 0.30          |
| Nakamurella                 | 0.06           | 0.05      | 1.03         | 0.45       | 11.20      | 0.36          |
| Aminobacter                 | 0.04           | 0.04      | 0.93         | 6.99       | 3.55       | 0.40          |
| Aquisphaera                 | 0.04           | 0.04      | 1.01         | 0.10       | 7.33       | 0.44          |
| unclass_Actinomycetales     | 0.03           | 0.03      | 1.02         | 0.18       | 5.52       | 0.47          |
| Bosea                       | 0.02           | 0.03      | 0.70         | 4.09       | 0.00       | 0.49          |
| Novosphingobium             | 0.02           | 0.02      | 1.08         | 0.68       | 3.94       | 0.51          |
| Schlesneria                 | 0.02           | 0.02      | 0.80         | 3.81       | 0.00       | 0.53          |

*Table S15 SIMPER analysis of the bacterial phyla driving difference in Bray-Curtis distance in air and precipitation*

|                           |                |           |              |            |            |               |
|---------------------------|----------------|-----------|--------------|------------|------------|---------------|
| <b>Air_seasons_Snow</b>   | <b>average</b> | <b>sd</b> | <b>ratio</b> | <b>ava</b> | <b>avb</b> | <b>cumsum</b> |
| Proteobacteria            | 0.11           | 0.08      | 1.44         | 39.41      | 23.22      | 0.20          |
| Firmicutes                | 0.11           | 0.12      | 0.89         | 23.31      | 4.38       | 0.38          |
| Actinobacteria            | 0.10           | 0.07      | 1.44         | 11.05      | 25.11      | 0.55          |
| Bacteroidetes             | 0.08           | 0.07      | 1.06         | 5.67       | 18.49      | 0.69          |
| Cyanobacteria/Chloroplast | 0.06           | 0.05      | 1.27         | 2.65       | 12.86      | 0.80          |
| Acidobacteria             | 0.03           | 0.03      | 1.01         | 4.53       | 4.49       | 0.85          |
| Verrucomicrobia           | 0.03           | 0.03      | 0.81         | 3.44       | 4.29       | 0.90          |
| Planctomycetes            | 0.03           | 0.03      | 0.91         | 6.28       | 3.17       | 0.94          |
| Chloroflexi               | 0.01           | 0.02      | 0.69         | 1.15       | 2.11       | 0.97          |
| Cand. Saccharibacteria    | 0.01           | 0.01      | 0.58         | 0.59       | 0.72       | 0.98          |
| <b>Air_seasons_Cloud</b>  | <b>average</b> | <b>sd</b> | <b>ratio</b> | <b>ava</b> | <b>avb</b> | <b>cumsum</b> |
| Proteobacteria            | 0.13           | 0.09      | 1.43         | 39.41      | 36.62      | 0.25          |
| Firmicutes                | 0.10           | 0.12      | 0.88         | 23.31      | 6.42       | 0.44          |
| Actinobacteria            | 0.09           | 0.07      | 1.36         | 11.05      | 22.78      | 0.62          |
| Cyanobacteria/Chloroplast | 0.06           | 0.05      | 1.17         | 2.65       | 11.06      | 0.72          |
| Bacteroidetes             | 0.03           | 0.03      | 1.19         | 5.67       | 6.53       | 0.79          |
| Acidobacteria             | 0.03           | 0.03      | 1.06         | 4.53       | 6.24       | 0.85          |
| Planctomycetes            | 0.02           | 0.03      | 0.91         | 6.28       | 3.69       | 0.90          |
| Verrucomicrobia           | 0.02           | 0.03      | 0.70         | 3.44       | 2.95       | 0.94          |
| Chloroflexi               | 0.01           | 0.02      | 0.67         | 1.15       | 1.90       | 0.96          |
| Cand. Saccharibacteria    | 0.00           | 0.01      | 0.40         | 0.59       | 0.33       | 0.97          |
| <b>Air_seasons_Rain</b>   | <b>average</b> | <b>sd</b> | <b>ratio</b> | <b>ava</b> | <b>avb</b> | <b>cumsum</b> |
| Acidobacteria             | 0.11           | 0.10      | 1.16         | 4.53       | 22.73      | 0.21          |
| Actinobacteria            | 0.11           | 0.08      | 1.38         | 11.05      | 21.69      | 0.41          |
| Firmicutes                | 0.11           | 0.12      | 0.87         | 23.31      | 2.96       | 0.61          |
| Proteobacteria            | 0.10           | 0.07      | 1.39         | 39.41      | 42.93      | 0.79          |
| Planctomycetes            | 0.04           | 0.03      | 1.32         | 6.28       | 7.33       | 0.86          |
| Bacteroidetes             | 0.03           | 0.03      | 0.81         | 5.67       | 2.37       | 0.91          |
| Verrucomicrobia           | 0.02           | 0.04      | 0.46         | 3.44       | 0.00       | 0.94          |
| Cyanobacteria/Chloroplast | 0.01           | 0.04      | 0.32         | 2.65       | 0.00       | 0.97          |
| Chloroflexi               | 0.01           | 0.02      | 0.31         | 1.15       | 0.00       | 0.98          |
| Chlamydiae                | 0.00           | 0.01      | 0.38         | 0.74       | 0.00       | 0.98          |
| <b>Air_seasons_Hail</b>   | <b>average</b> | <b>sd</b> | <b>ratio</b> | <b>ava</b> | <b>avb</b> | <b>cumsum</b> |
| Proteobacteria            | 0.25           | 0.11      | 2.33         | 39.41      | 88.59      | 0.46          |
| Firmicutes                | 0.12           | 0.13      | 0.91         | 23.31      | 0.01       | 0.68          |
| Actinobacteria            | 0.04           | 0.06      | 0.67         | 11.05      | 5.31       | 0.75          |
| Planctomycetes            | 0.03           | 0.03      | 0.92         | 6.28       | 0.06       | 0.81          |
| Bacteroidetes             | 0.03           | 0.03      | 0.94         | 5.67       | 4.73       | 0.86          |
| Acidobacteria             | 0.02           | 0.03      | 0.66         | 4.53       | 0.31       | 0.91          |
| Verrucomicrobia           | 0.02           | 0.04      | 0.46         | 3.44       | 0.03       | 0.94          |
| Cyanobacteria/Chloroplast | 0.01           | 0.04      | 0.36         | 2.65       | 0.75       | 0.96          |
| Chloroflexi               | 0.01           | 0.02      | 0.30         | 1.15       | 0.00       | 0.97          |
| Chlamydiae                | 0.00           | 0.01      | 0.38         | 0.74       | 0.00       | 0.98          |

Table S16 SIMPER analysis of the fungal genera driving difference in Bray-Curtis distance in seasonal air

| <b>Feb vs. May</b> | <b>average</b> | <b>sd</b> | <b>ratio</b> | <b>ava</b> | <b>avb</b> | <b>cumsum</b> |
|--------------------|----------------|-----------|--------------|------------|------------|---------------|
| unidentified.112   | 0.17           | 0.13      | 1.34         | 35.87      | 2.34       | 0.18          |
| Wallemia           | 0.08           | 0.15      | 0.51         | 5.68       | 11.11      | 0.26          |
| Aspergillus        | 0.06           | 0.15      | 0.39         | 1.34       | 11.11      | 0.32          |
| Phanerochaete      | 0.06           | 0.16      | 0.35         | 0.00       | 11.11      | 0.38          |
| unidentified.65    | 0.06           | 0.16      | 0.35         | 0.00       | 11.11      | 0.44          |
| Holtermanniella    | 0.05           | 0.15      | 0.35         | 0.00       | 10.22      | 0.49          |
| unidentified.11    | 0.05           | 0.11      | 0.40         | 1.30       | 8.25       | 0.54          |
| Fomitopsis         | 0.05           | 0.13      | 0.35         | 0.01       | 9.01       | 0.58          |
| Candida            | 0.04           | 0.10      | 0.35         | 0.00       | 7.25       | 0.62          |
| Trichaptum         | 0.03           | 0.08      | 0.35         | 0.00       | 5.56       | 0.65          |
| <b>Feb vs. Aug</b> | <b>average</b> | <b>sd</b> | <b>ratio</b> | <b>ava</b> | <b>avb</b> | <b>cumsum</b> |
| unidentified.112   | 0.16           | 0.12      | 1.32         | 35.87      | 3.75       | 0.17          |
| Sarcogyne          | 0.04           | 0.07      | 0.55         | 0.00       | 7.30       | 0.21          |
| unidentified.107   | 0.04           | 0.03      | 1.33         | 1.22       | 7.00       | 0.25          |
| Mycena             | 0.03           | 0.06      | 0.48         | 5.44       | 0.51       | 0.28          |
| Wallemia           | 0.03           | 0.06      | 0.50         | 5.68       | 0.00       | 0.31          |
| Acarospora         | 0.03           | 0.04      | 0.68         | 1.29       | 4.57       | 0.33          |
| Saccharomyces      | 0.03           | 0.08      | 0.30         | 5.10       | 0.00       | 0.36          |
| unidentified.60    | 0.02           | 0.04      | 0.63         | 4.19       | 1.31       | 0.39          |
| Fomitopsis         | 0.02           | 0.02      | 0.86         | 0.01       | 4.28       | 0.41          |
| unidentified.11    | 0.02           | 0.02      | 1.05         | 1.30       | 3.49       | 0.43          |
| <b>Feb vs. Nov</b> | <b>average</b> | <b>sd</b> | <b>ratio</b> | <b>ava</b> | <b>avb</b> | <b>cumsum</b> |
| unidentified.112   | 0.13           | 0.11      | 1.12         | 35.87      | 34.47      | 0.17          |
| unidentified.25    | 0.11           | 0.07      | 1.72         | 0.00       | 22.75      | 0.32          |
| Exophiala          | 0.07           | 0.05      | 1.22         | 0.68       | 13.62      | 0.41          |
| Filobasidium       | 0.06           | 0.09      | 0.66         | 1.51       | 11.49      | 0.49          |
| Wallemia           | 0.03           | 0.06      | 0.52         | 5.68       | 0.19       | 0.52          |
| Mycena             | 0.03           | 0.06      | 0.44         | 5.44       | 0.00       | 0.56          |
| Saccharomyces      | 0.03           | 0.08      | 0.30         | 5.10       | 0.00       | 0.59          |
| unidentified.60    | 0.02           | 0.04      | 0.52         | 4.19       | 0.22       | 0.62          |
| Extremus           | 0.02           | 0.06      | 0.30         | 3.63       | 0.01       | 0.65          |
| Cystobasidium      | 0.02           | 0.02      | 0.65         | 2.53       | 1.08       | 0.67          |
| <b>May vs. Aug</b> | <b>average</b> | <b>sd</b> | <b>ratio</b> | <b>ava</b> | <b>avb</b> | <b>cumsum</b> |
| Phanerochaete      | 0.07           | 0.15      | 0.47         | 11.11      | 3.45       | 0.07          |
| Fomitopsis         | 0.06           | 0.12      | 0.53         | 9.001      | 4.28       | 0.14          |
| Aspergillus        | 0.06           | 0.16      | 0.35         | 11.11      | 0.00       | 0.19          |
| Wallemia           | 0.06           | 0.16      | 0.35         | 11.11      | 0.00       | 0.25          |
| unidentified.65    | 0.06           | 0.16      | 0.35         | 11.11      | 0.00       | 0.31          |
| unidentified.11    | 0.05           | 0.11      | 0.51         | 8.25       | 3.49       | 0.37          |
| Holtermanniella    | 0.05           | 0.15      | 0.35         | 10.22      | 0.00       | 0.42          |
| unidentified.107   | 0.04           | 0.03      | 1.25         | 4.57       | 7.00       | 0.46          |
| Trichaptum         | 0.04           | 0.08      | 0.48         | 5.57       | 2.29       | 0.50          |
| Sarcogyne          | 0.04           | 0.07      | 0.55         | 0.00       | 7.30       | 0.54          |
| <b>May vs. Nov</b> | <b>average</b> | <b>sd</b> | <b>ratio</b> | <b>ava</b> | <b>avb</b> | <b>cumsum</b> |
| unidentified.112   | 0.16           | 0.12      | 1.38         | 2.34       | 34.47      | 0.17          |
| unidentified.25    | 0.11           | 0.07      | 1.72         | 0.00       | 22.75      | 0.28          |
| Exophiala          | 0.07           | 0.06      | 1.23         | 0.00       | 13.62      | 0.35          |
| Filobasidium       | 0.06           | 0.09      | 0.61         | 0.00       | 11.49      | 0.41          |
| Wallemia           | 0.06           | 0.16      | 0.36         | 11.11      | 0.19       | 0.47          |
| Aspergillus        | 0.06           | 0.16      | 0.35         | 11.11      | 0.01       | 0.53          |
| Phanerochaete      | 0.06           | 0.16      | 0.35         | 11.11      | 0.00       | 0.58          |
| unidentified.65    | 0.06           | 0.16      | 0.35         | 11.11      | 0.00       | 0.64          |
| Holtermanniella    | 0.05           | 0.15      | 0.35         | 10.21      | 0.00       | 0.69          |
| Fomitopsis         | 0.05           | 0.13      | 0.35         | 9.005      | 0.00       | 0.74          |
| <b>Aug vs. Nov</b> | <b>average</b> | <b>sd</b> | <b>ratio</b> | <b>ava</b> | <b>avb</b> | <b>cumsum</b> |
| unidentified.112   | 0.15           | 0.12      | 1.32         | 3.75       | 34.47      | 0.1636        |
| unidentified.25    | 0.11           | 0.07      | 1.66         | 0.95       | 22.75      | 0.2804        |
| Exophiala          | 0.07           | 0.06      | 1.23         | 0.00       | 13.62      | 0.3528        |
| Filobasidium       | 0.06           | 0.09      | 0.62         | 0.01       | 11.49      | 0.4137        |
| Sarcogyne          | 0.04           | 0.07      | 0.55         | 7.30       | 0.00       | 0.4525        |

|                  |      |      |      |      |      |        |
|------------------|------|------|------|------|------|--------|
| unidentified.107 | 0.03 | 0.03 | 1.31 | 7.00 | 0.48 | 0.4886 |
| Acarospora       | 0.02 | 0.04 | 0.60 | 4.57 | 0.00 | 0.5129 |
| Fomitopsis       | 0.02 | 0.02 | 0.86 | 4.28 | 0.00 | 0.5356 |
| Phanerochaete    | 0.02 | 0.02 | 0.98 | 3.45 | 0.00 | 0.5540 |
| unidentified.11  | 0.02 | 0.02 | 1.05 | 3.49 | 0.58 | 0.5721 |

*Table S172 SIMPER analysis of the fungal classes driving difference in Bray-Curtis distance in air and precipitation*

| <b>Air_seasons_Snow</b>  | <b>average</b> | <b>sd</b> | <b>ratio</b> | <b>ava</b> | <b>avb</b> | <b>cumsum</b> |
|--------------------------|----------------|-----------|--------------|------------|------------|---------------|
| Agaricomycetes           | 0.16           | 0.14      | 1.11         | 33.44      | 10.42      | 0.21          |
| unidentified.5           | 0.10           | 0.11      | 0.96         | 20.28      | 12.56      | 0.34          |
| Lecanoromycetes          | 0.10           | 0.07      | 1.35         | 5.11       | 18.81      | 0.47          |
| Eurotiomycetes           | 0.08           | 0.09      | 0.91         | 9.56       | 14.22      | 0.58          |
| Dothideomycetes          | 0.07           | 0.06      | 1.11         | 2.81       | 14.22      | 0.67          |
| Sordariomycetes          | 0.04           | 0.06      | 0.75         | 6.34       | 4.54       | 0.73          |
| Tremellomycetes          | 0.03           | 0.08      | 0.43         | 5.83       | 2.39       | 0.78          |
| Leotiomycetes            | 0.03           | 0.03      | 1.37         | 2.38       | 7.58       | 0.82          |
| unidentified.3           | 0.02           | 0.02      | 1.00         | 3.21       | 3.56       | 0.85          |
| Wallemiomycetes          | 0.02           | 0.08      | 0.28         | 3.96       | 0.60       | 0.88          |
| <b>Air_seasons_Cloud</b> | <b>average</b> | <b>sd</b> | <b>ratio</b> | <b>ava</b> | <b>avb</b> | <b>cumsum</b> |
| Agaricomycetes           | 0.15           | 0.13      | 1.11         | 33.44      | 12.18      | 0.20          |
| unidentified.5           | 0.11           | 0.12      | 0.98         | 20.28      | 17.03      | 0.36          |
| Tremellomycetes          | 0.10           | 0.15      | 0.65         | 5.83       | 16.88      | 0.49          |
| Eurotiomycetes           | 0.08           | 0.10      | 0.81         | 9.56       | 12.38      | 0.60          |
| Dothideomycetes          | 0.08           | 0.06      | 1.31         | 2.81       | 15.96      | 0.70          |
| Lecanoromycetes          | 0.05           | 0.06      | 0.84         | 5.11       | 6.54       | 0.77          |
| Sordariomycetes          | 0.04           | 0.05      | 0.67         | 6.34       | 2.14       | 0.82          |
| Leotiomycetes            | 0.03           | 0.02      | 1.65         | 2.38       | 6.32       | 0.85          |
| unidentified.3           | 0.03           | 0.02      | 1.19         | 3.21       | 4.97       | 0.89          |
| Wallemiomycetes          | 0.03           | 0.08      | 0.35         | 3.96       | 1.80       | 0.93          |
| <b>Air_seasons_Rain</b>  | <b>average</b> | <b>sd</b> | <b>ratio</b> | <b>ava</b> | <b>avb</b> | <b>cumsum</b> |
| Agaricomycetes           | 0.20           | 0.15      | 1.38         | 33.44      | 55.46      | 0.28          |
| Sordariomycetes          | 0.19           | 0.17      | 1.12         | 6.34       | 37.21      | 0.54          |
| unidentified.5           | 0.10           | 0.12      | 0.83         | 20.28      | 0.56       | 0.68          |
| Eurotiomycetes           | 0.05           | 0.11      | 0.44         | 9.56       | 0.05       | 0.75          |
| unidentified             | 0.03           | 0.03      | 1.00         | 0.01       | 6.15       | 0.79          |
| Tremellomycetes          | 0.03           | 0.09      | 0.34         | 5.83       | 0.00       | 0.83          |
| Lecanoromycetes          | 0.03           | 0.07      | 0.36         | 5.11       | 0.10       | 0.86          |
| Saccharomycetes          | 0.02           | 0.07      | 0.31         | 4.20       | 0.00       | 0.89          |
| Wallemiomycetes          | 0.02           | 0.08      | 0.24         | 3.96       | 0.00       | 0.92          |
| unidentified.3           | 0.02           | 0.03      | 0.54         | 3.21       | 0.00       | 0.94          |
| <b>Air_seasons_Hail</b>  | <b>average</b> | <b>sd</b> | <b>ratio</b> | <b>ava</b> | <b>avb</b> | <b>cumsum</b> |
| Agaricomycetes           | 0.16           | 0.16      | 1.01         | 33.44      | 2.89       | 0.19          |
| Dothideomycetes          | 0.15           | 0.03      | 5.55         | 2.81       | 32.40      | 0.38          |
| Leotiomycetes            | 0.13           | 0.02      | 5.78         | 2.38       | 28.08      | 0.54          |
| unidentified.5           | 0.09           | 0.10      | 0.94         | 20.28      | 10.05      | 0.65          |
| Tremellomycetes          | 0.05           | 0.07      | 0.67         | 5.83       | 6.91       | 0.71          |
| Eurotiomycetes           | 0.05           | 0.10      | 0.46         | 9.56       | 2.21       | 0.77          |
| Sordariomycetes          | 0.03           | 0.06      | 0.56         | 6.34       | 0.65       | 0.80          |
| Arthoniomycetes          | 0.03           | 0.00      | 14.70        | 0.10       | 6.10       | 0.84          |
| Lecanoromycetes          | 0.03           | 0.07      | 0.41         | 5.11       | 1.11       | 0.88          |
| unidentified.3           | 0.02           | 0.02      | 1.39         | 3.21       | 4.23       | 0.91          |

*Table 18 SIMPER analysis of the fungal phyla driving difference in Bray-Curtis distance in air and precipitation*

| <b>Air_seasons_Snow</b>  | <b>average</b> | <b>sd</b> | <b>ratio</b> | <b>ava</b> | <b>avb</b> | <b>cumsum</b> |
|--------------------------|----------------|-----------|--------------|------------|------------|---------------|
| Ascomycota               | 0.21           | 0.13      | 1.63         | 34.24      | 66.10      | 0.42          |
| Basidiomycota            | 0.18           | 0.13      | 1.35         | 45.44      | 18.27      | 0.77          |
| unidentified.1           | 0.10           | 0.11      | 0.96         | 20.28      | 12.56      | 0.97          |
| Chytridiomycota          | 0.01           | 0.03      | 0.43         | 0.01       | 2.49       | 0.99          |
| <b>Air_seasons_Cloud</b> | <b>average</b> | <b>sd</b> | <b>ratio</b> | <b>ava</b> | <b>avb</b> | <b>cumsum</b> |
| Basidiomycota            | 0.18           | 0.12      | 1.41         | 45.44      | 32.47      | 0.38          |
| Ascomycota               | 0.17           | 0.12      | 1.47         | 34.24      | 49.38      | 0.74          |
| unidentified.1           | 0.11           | 0.12      | 0.98         | 20.28      | 17.03      | 0.99          |
| Mortierellomycota        | 0.00           | 0.00      | 0.46         | 0.00       | 0.44       | 0.99          |
| <b>Air_seasons_Rain</b>  | <b>average</b> | <b>sd</b> | <b>ratio</b> | <b>ava</b> | <b>avb</b> | <b>cumsum</b> |
| Ascomycota               | 0.20           | 0.13      | 1.48         | 34.24      | 37.83      | 0.39          |
| Basidiomycota            | 0.19           | 0.14      | 1.36         | 45.44      | 55.46      | 0.75          |
| unidentified.1           | 0.10           | 0.12      | 0.83         | 20.28      | 0.56       | 0.94          |
| Chytridiomycota          | 0.03           | 0.03      | 1.00         | 0.01       | 6.15       | 1.00          |
| <b>Air_seasons_Hail</b>  | <b>average</b> | <b>sd</b> | <b>ratio</b> | <b>ava</b> | <b>avb</b> | <b>cumsum</b> |
| Ascomycota               | 0.23           | 0.11      | 1.98         | 34.24      | 75.16      | 0.46          |
| Basidiomycota            | 0.17           | 0.14      | 1.24         | 45.44      | 14.64      | 0.81          |
| unidentified.1           | 0.09           | 0.10      | 0.94         | 20.28      | 10.05      | 1.00          |
| Chytridiomycota          | 0.00           | 0.00      | 77.64        | 0.01       | 0.13       | 1.00          |
